# Supplementary material for: Whole genome comparison between table and wine grapes reveals a comprehensive catalog of structural variants
Source: PubMed Central journal article supplement (PMC3890619; doi:10.1186/1471-2229-14-7), 2014-01-07
Supplement: 1471-2229-14-7-S1.pdf [file 1471-2229-14-7-S1.pdf]

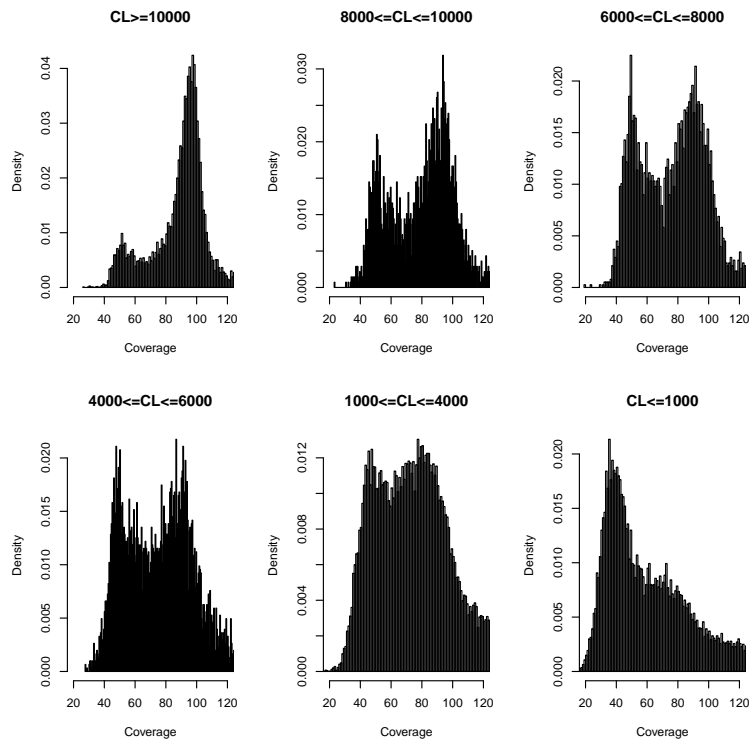

**Supplementary Figure 1:** Histograms of contig coverage at 100X. The contig coverage is defined as the average depth at each position in a given contig. We depict histograms for different ranges of contig length (CL = Contig Length). Contigs with an average coverage out of the interval [20, 120] are excluded. The largest contigs are mostly homozygous while smaller contigs are predominantly heterozygous.
