# Supplementary material for: Whole genome comparison between table and wine grapes reveals a comprehensive catalog of structural variants
Source: PubMed Central journal article supplement (PMC3890619; doi:10.1186/1471-2229-14-7), 2014-01-07
Supplement: 1471-2229-14-7-S2.pdf [file 1471-2229-14-7-S2.pdf]

**Supplementary Table 1** – Full list of the 240 novel genes and their functional annotation. ID refers to reference number in ‘Sultanina’ genome, ID EST refers to accession number on NCBI. Functional annotation was done using NR (e-value <  $e - 10$ ). We list only the first 8 EST ID for genes having more than 8 supporting EST sequences.

| ID       | ID EST                                                                     | Number EST | Evalue | Description             |
|----------|----------------------------------------------------------------------------|------------|--------|-------------------------|
| g10.t1   | CD007346                                                                   | 1          | -      | hypothetical protein    |
| g1002.t1 | CD007319 CD006194 CD008458 CD009282<br>CD007776 DT036856 DT032231 CD721143 | 15         | 1e-106 | transposon related gene |
| g1003.t1 | BM437406 EC921778 EC945718 GR883523<br>EC942828 EC920537 EC954072          | 7          | -      | hypothetical protein    |
| g1005.t1 | DT039195 DT033235 DT039156                                                 | 3          | 4e-19  | disease resistance      |
| g1007.t1 | CB001087 CD010393                                                          | 2          | 6e-24  | transposon related gene |
| g1009.t1 | CD005274 DT031706 CD010393 CD009413<br>DT029519 DT027229 DT026807 EE077049 | 14         | 7e-82  | transposon related gene |
| g1010.t1 | CD010209 CD008619 CD006348 CD010433<br>CD010832                            | 5          | 8e-24  | disease resistance      |
| g1014.t1 | DT036856 CB001977                                                          | 2          | 9e-76  | transposon related gene |
| g1029.t1 | CB003499 CB002610 CD004776 CD712542<br>CD012081                            | 5          | -      | hypothetical protein    |
| g103.t1  | DT031000 EC933301 CB340461 CD012079<br>DT027360 EC992570                   | 6          | -      | hypothetical protein    |
| g1030.t1 | CB001087 CD004941 CB004182 CD010393<br>CD009413 CB002262 CB001977 CB004272 | 8          | 1e-115 | transposon related gene |
| g1031.t1 | CD713731 CD721638 CD721341 CD010771<br>CD718101                            | 5          | 8e-21  | disease resistance      |

*continued in next page*

| ID       | ID EST                                                                     | Number EST | Evalue | Description             |
|----------|----------------------------------------------------------------------------|------------|--------|-------------------------|
| g1032.t1 | DT029996 DT035206 DT030022 DT029533<br>DT037869 CD712548 DT029919 DT027364 | 10         | -      | hypothetical protein    |
| g1039.t1 | EE085961 EE088015 EC951511 EE100214<br>EE080861 GR907013 EE080759 EE100556 | 14         | -      | hypothetical protein    |
| g1046.t1 | DT033469                                                                   | 1          | -      | hypothetical protein    |
| g1065.t1 | CD012176 CD721383 CD721095 CD721314<br>CD006296 CD011236 DT023827          | 7          | 1e-24  | transposon related gene |
| g1073.t1 | CB003473 CD005012 CB002663 CB002243                                        | 4          | -      | hypothetical protein    |
| g108.t1  | DT033342 DT038772                                                          | 2          | 0.0    | transposon related gene |
| g116.t1  | CB002529 EC932637 CD005546 EC951380<br>DT028128 BQ793160 CB002740          | 10         | 1e-110 | transposon related gene |
| g117.t1  | DT030995 CB003048 DT030660 CB002154                                        | 4          | 1e-23  | transposon related gene |
| g121.t1  | CB837070 CB838418 DT034493 DT038048<br>CB838867 DV223855 CB836719 CB838295 | 40         | 1e-179 | transposon related gene |
| g125.t1  | CD010483 CD714710 CD007733 CD720933<br>CD716980 CD007022 CD007034          | 7          | 8e-85  | transposon related gene |
| g126.t1  | CD717270 CD010754 CD009121 CD721377<br>CD008977 CD713773 CD713202 CD007268 | 31         | -      | hypothetical protein    |
| g127.t1  | CB975111 CD718653 CD005832                                                 | 3          | 7e-82  | transposon related gene |
| g13.t1   | EC941953 CD010754 CD009121 EC948760<br>CD721377 CD008977 CD714719 CD721414 | 11         | -      | hypothetical protein    |
| g141.t1  | CB003460 CD012176 CD004941 CF606311<br>CB002018                            | 5          | 2e-95  | transposon related gene |
| g142.t1  | DT011653                                                                   | 1          | -      | hypothetical protein    |
| g150.t1  | CB003748 CB002057 CD005489 CB001945<br>CD005398                            | 5          | -      | hypothetical protein    |
| g153.t1  | CD719843                                                                   | 1          | -      | hypothetical protein    |
| g155.t1  | DT033833 CD013705                                                          | 2          | 3e-60  | transposon related gene |
| g157.t1  | CB002211 CB003513 CB004469 CB003314<br>CB001893 CD715915 CD004723 CB001692 | 8          | 1e-14  | transposon related gene |
| g159.t1  | CD012169                                                                   | 1          | -      | hypothetical protein    |

*continued in next page*

| ID      | ID EST                                                                     | Number EST | Evalue | Description             |
|---------|----------------------------------------------------------------------------|------------|--------|-------------------------|
| g16.t1  | CB340461 CD012079 EC992570                                                 | 4          | -      | hypothetical protein    |
| g169.t1 | CB001087 DT029075 CD004941 CD010393<br>DT029519 CB001805 DT038721 CD004767 | 31         | 1e-124 | transposon related gene |
| g17.t1  | DT034625 DT033056 DT038126 DT030552<br>DT033655 DT032551 DT031621 DT039233 | 8          | 1e-168 | transposon related gene |
| g174.t1 | CB837070 CB838418 CB836315 CB837362<br>CB838208 DV223855 CB838862 CB834181 | 19         | 5e-90  | transposon related gene |
| g176.t1 | DT033342 DT038772                                                          | 2          | 1e-138 | transposon related gene |
| g19.t1  | DT027172 DT028284                                                          | 2          | 1e-102 | transposon related gene |
| g191.t1 | CB349450 CB001102                                                          | 2          | -      | hypothetical protein    |
| g197.t1 | DT036167 DT037929                                                          | 2          | 2e-80  | transposon related gene |
| g198.t1 | DT016580 DT024059 EC956113 CD012081<br>DT036717 EC955756                   | 6          | 6e-20  | C-N bonds formation     |
| g2.t1   | CA816726                                                                   | 1          | -      | hypothetical protein    |
| g201.t1 | CD715460 CD718180                                                          | 2          | 2e-17  | embryo development      |
| g204.t1 | CF210876 CF210962 CF511664 EC971458<br>CF511749 CF372377                   | 6          | 2e-66  | transposon related gene |
| g209.t1 | CA814734                                                                   | 1          | 1e-136 | transposon related gene |
| g215.t1 | CB981038 CB001976 CF515505 CD715201<br>CD716339 DT030029 CF403438 CD005606 | 22         | -      | hypothetical protein    |
| g216.t1 | EC932637 CD005546 EC951380 DT028128<br>BQ793160 CB002740 CB002529 EC924251 | 11         | 1e-122 | transposon related gene |
| g217.t1 | DT028690 CF513957 CF513871 CF511834<br>DT029599 DT028148 CF511913          | 8          | 1e-55  | transposon related gene |
| g218.t1 | EC923615                                                                   | 1          | 1e-121 | transposon related gene |
| g219.t1 | CB001087 CB002756 DT027185 DT026631<br>DT028617 EC957075 CB003282 DT027045 | 40         | 2e-97  | transposon related gene |
| g222.t1 | CD008993 CF514887 CF515066 DV223609<br>CD008772 DT031690                   | 6          | 9e-48  | transposon related gene |
| g227.t1 | CD719536 CB980175 CF516008 CF602854<br>CD715628 CD721533 CD010727 CD010076 | 8          | -      | hypothetical protein    |

*continued in next page*

| ID      | ID EST                                                                     | Number EST | Evalue | Description             |
|---------|----------------------------------------------------------------------------|------------|--------|-------------------------|
| g237.t1 | GR906204 FC061917                                                          | 2          | 6e-72  | transposon related gene |
| g239.t1 | DV223800 DT032705 DT031935 DT037757<br>DT033476 DT031658 DT038259          | 7          | 2e-79  | transposon related gene |
| g240.t1 | CD714821 CB834319 CD011004 CD713014<br>CD720934 CD006730 CD008444 CB834375 | 9          | -      | hypothetical protein    |
| g243.t1 | CF511523                                                                   | 1          | 1e-24  | anthocyanin synthesis   |
| g248.t1 | CD713700 CD713736 CD007797 CD721674<br>CD719153 CD713320 CD010488          | 7          | -      | hypothetical protein    |
| g249.t1 | CD713700 CD008766 CD007797 CD719153<br>CD721674 CD713320 CD010488 CD713736 | 8          | -      | hypothetical protein    |
| g253.t1 | DT030995 DT030660 DT036146                                                 | 3          | 4e-11  | transposon related gene |
| g259.t1 | CF510795 CF510882                                                          | 2          | 4e-27  | transposon related gene |
| g260.t1 | DT033019 DV224001 EC966931 DT038645<br>CD712479 DT030995 DT030660 DT015079 | 8          | 2e-79  | transposon related gene |
| g263.t1 | FC057450                                                                   | 1          | 3e-51  | disease resistance      |
| g265.t1 | CF606288                                                                   | 1          | -      | hypothetical protein    |
| g267.t1 | CB002540 CD715935 CB004402                                                 | 3          | 4e-15  | transposon related gene |
| g27.t1  | DT034287                                                                   | 1          | 3e-78  | transposon related gene |
| g272.t1 | CA816726                                                                   | 2          | 9e-14  | transposon related gene |
| g274.t1 | CD011948                                                                   | 1          | -      | hypothetical protein    |
| g282.t1 | DT037565 DT038721 DT032970 CB001977                                        | 4          | 9e-76  | transposon related gene |
| g286.t1 | CD010483 CD714710 CD007733 CD720933<br>CD716980 CD007022 CD007034          | 7          | 2e-92  | transposon related gene |
| g291.t1 | CB981038 EC951380 CB001976 CF515505<br>CD715201 CD716339 CF403438 CB003695 | 22         | 1e-129 | transposon related gene |
| g293.t1 | EC965775                                                                   | 1          | 8e-95  | transposon related gene |
| g298.t1 | CF519169 CB343515                                                          | 2          | -      | hypothetical protein    |
| g3.t1   | DT027070 CB001496 DT027895 DT027322                                        | 6          | 1e-168 | transposon related gene |
| g301.t1 | CD720251                                                                   | 1          | 8e-32  | transposon related gene |
| g314.t1 | DT034776 DT033543 DT036992 DT030622<br>DT033738 DT035723 DV224060          | 7          | 5e-35  | disease resistance      |

*continued in next page*

| ID      | ID EST                                                                     | Number EST | Evalue | Description             |
|---------|----------------------------------------------------------------------------|------------|--------|-------------------------|
| g32.t1  | CD712542 DT024059 EC956113 DT036717<br>CD012081 EC955756                   | 6          | 3e-20  | C-N bonds formation     |
| g329.t1 | CB001087 CD004941 CD010393 DT029519<br>CB001977 DT029280 DT028943 CB004182 | 22         | 1e-153 | transposon related gene |
| g33.t1  | CD712535                                                                   | 1          | 1e-104 | transposon related gene |
| g335.t1 | DT037853                                                                   | 1          | -      | hypothetical protein    |
| g342.t1 | CB002403 CB340027 EC933301 CB340461<br>CD012079 CB002414 CB003489 EC992570 | 9          | 3e-35  | transposon related gene |
| g345.t1 | CB981713 CB981642                                                          | 2          | 1e-114 | transposon related gene |
| g346.t1 | DT019387 EC949623 EE071581 CF372684                                        | 5          | -      | hypothetical protein    |
| g347.t1 | GR903979 CB834745 FC055926 CF512440<br>DT039173 DT031395 CD007996 CV099016 | 13         | 2e-57  | transposon related gene |
| g353.t1 | CD721624 CD007733 CD713255 CD716980<br>CD011184 CD721642 CD718016 CD010483 | 14         | 7e-84  | transposon related gene |
| g354.t1 | CD719843                                                                   | 1          | -      | hypothetical protein    |
| g356.t1 | CD004991 CB003574 DT038680                                                 | 3          | 2e-64  | transposon related gene |
| g36.t1  | FC055079                                                                   | 1          | -      | hypothetical protein    |
| g362.t1 | CD007346                                                                   | 2          | -      | hypothetical protein    |
| g365.t1 | CD713281 CD009597 CD714361 CD718459<br>CD010473 CD721371 CD720746 CD714033 | 21         | 9e-66  | transposon related gene |
| g368.t1 | CD720251 DV223609 DT031690                                                 | 3          | 1e-73  | transposon related gene |
| g369.t1 | CD006194 CD008458 CD009282 CB001805<br>CD007776 DT032231 CD004767 CB001977 | 18         | 1e-105 | transposon related gene |
| g374.t1 | DT033473                                                                   | 1          | 1e-39  | transposon related gene |
| g376.t1 | CD714464 CD717382 CD717640 CD011562<br>CD714110 CD009156 CD716942 CD719801 | 9          | 3e-63  | transposon related gene |
| g388.t1 | CD719952 CD721678 CD718698                                                 | 3          | 1e-48  | transposon related gene |
| g392.t1 | CB004174 CD010483 CD714710 CD007733<br>CD720933 CD716980 CD007022 CD007034 | 8          | 1e-100 | transposon related gene |
| g4.t1   | CD007346 CD005638                                                          | 6          | -      | hypothetical protein    |

*continued in next page*

| ID      | ID EST                                                                     | Number EST | Evalue | Description             |
|---------|----------------------------------------------------------------------------|------------|--------|-------------------------|
| g404.t1 | CD010754 CD009121 CB834319 CD721377<br>CD008977 CD714719 CD721414 CD009423 | 11         | -      | hypothetical protein    |
| g405.t1 | CV092517                                                                   | 1          | 1e-44  | transposon related gene |
| g406.t1 | CF518486                                                                   | 1          | -      | hypothetical protein    |
| g411.t1 | EC990465 DT006280 EC978272                                                 | 3          | 1e-148 | transposon related gene |
| g426.t1 | CB003513                                                                   | 1          | 3e-41  | transposon related gene |
| g428.t1 | CD012032                                                                   | 1          | -      | hypothetical protein    |
| g437.t1 | CA814734                                                                   | 1          | -      | hypothetical protein    |
| g439.t1 | DT032139 DT036777 DT036782                                                 | 3          | -      | hypothetical protein    |
| g449.t1 | GR903625 CF516835                                                          | 4          | 1e-18  | transposon related gene |
| g452.t1 | DT027070 DT027895 CD721286 CD713959<br>CD720796 CD715195 CD714292 DT027322 | 14         | 0.0    | transposon related gene |
| g453.t1 | CN604289                                                                   | 1          | 4e-21  | hypothetical protein    |
| g457.t1 | EC941953 EC948760                                                          | 4          | 8e-20  | transposon related gene |
| g459.t1 | CD007733 CD716980 CB001805 DT037565<br>CD010483 CB001806 CD004767 DT032970 | 11         | 3e-93  | transposon related gene |
| g46.t1  | DT027070 DT027895 CD713959 CD721286<br>CD006368 CD715195 CD720796 CD714292 | 19         | 1e-116 | transposon related gene |
| g47.t1  | EV235794 DT028286 EC991268 EV236954<br>EV231387                            | 6          | -      | hypothetical protein    |
| g475.t1 | CD719843                                                                   | 1          | -      | hypothetical protein    |
| g476.t1 | CB969255 CB969176 CB003719 CB001828<br>CB001896 CB003419 GR906385          | 8          | -      | hypothetical protein    |
| g479.t1 | CV093063 FG580032 CN546617 CF513876<br>CF513962                            | 5          | -      | hypothetical protein    |
| g481.t1 | CD004723                                                                   | 1          | 1e-20  | transposon related gene |
| g488.t1 | CF518486                                                                   | 1          | -      | hypothetical protein    |
| g491.t1 | CD012240 CD012065 CD012028 DT029503<br>DT029661                            | 5          | 2e-34  | transposon related gene |
| g493.t1 | CB003048 DT030995 CD007980 DT030660<br>CD714050 CB002154 DT032676 CD720098 | 8          | 1e-104 | transposon related gene |

*continued in next page*

| <b>ID</b> | <b>ID EST</b>                                                              | <b>Number EST</b> | <b>Evalue</b> | <b>Description</b>      |
|-----------|----------------------------------------------------------------------------|-------------------|---------------|-------------------------|
| g5.t1     | CB003460 CB002018                                                          | 2                 | 4e-14         | transposon related gene |
| g504.t1   | CB001087 CD010393 CD009413                                                 | 3                 | 3e-66         | transposon related gene |
| g510.t1   | CD347668                                                                   | 1                 | 2e-45         | transposon related gene |
| g513.t1   | CF606288                                                                   | 1                 | 3e-13         | disease resistance      |
| g515.t1   | CD716753                                                                   | 1                 | 1e-70         | transposon related gene |
| g518.t1   | CB001087 DT036167 DT037929                                                 | 3                 | 3e-74         | transposon related gene |
| g523.t1   | EC928918                                                                   | 1                 | 2e-62         | transposon related gene |
| g527.t1   | CB979829 DT035083                                                          | 2                 | 3e-35         | transposon related gene |
| g535.t1   | EE075636 CF518822                                                          | 2                 | 1e-103        | transposon related gene |
| g536.t1   | DT027360                                                                   | 1                 | -             | hypothetical protein    |
| g540.t1   | CD012021 CB002052                                                          | 3                 | -             | hypothetical protein    |
| g541.t1   | CF606362 CF606257 CB834472 DT032175<br>DT033277 DT032224                   | 6                 | -             | hypothetical protein    |
| g547.t1   | DV223926 DT038356 DT036743 DT038167<br>DT039176 DT031307 DT038952 DT038343 | 16                | 3e-25         | transposon related gene |
| g551.t1   | DT039195 CD010771 CD713731 CD721638<br>CD721341 CD718101 DT039156 DT033235 | 13                | -             | hypothetical protein    |
| g555.t1   | CD007733 CD716980 CD007034                                                 | 3                 | 7e-39         | transposon related gene |
| g557.t1   | CD006924 CD713612 CD713635 CD713323<br>CD011323 CD010806 CD720084 CD714860 | 18                | -             | hypothetical protein    |
| g558.t1   | CD010040 CD009454 CD009806 CD006843<br>CD714333                            | 5                 | 1e-140        | transposon related gene |
| g560.t1   | CF511626 CF511541 CF202770                                                 | 3                 | 8e-34         | transposon related gene |
| g562.t1   | CB343271                                                                   | 1                 | -             | hypothetical protein    |
| g568.t1   | DT034287                                                                   | 1                 | 3e-24         | transposon related gene |
| g572.t1   | EC932637 DT028128                                                          | 2                 | 1e-125        | transposon related gene |
| g573.t1   | DT035844 DT033180 DT037986 DT039072<br>DT036962 DT032138 DT033471          | 13                | 1e-14         | C-N bonds formation     |
| g581.t1   | DT030687 CD714710 CD007733 DT037774<br>CD716980 DT037565 CD010483 DT038721 | 15                | 1e-103        | transposon related gene |

*continued in next page*

| ID      | ID EST                                                                     | Number EST | Evalue | Description             |
|---------|----------------------------------------------------------------------------|------------|--------|-------------------------|
| g583.t1 | CD006924 CD713612 CD713635 CD713323<br>CD011323 CD010806 CD720084 CD714860 | 18         | -      | hypothetical protein    |
| g588.t1 | DT032522 DT032409 DT033027 CF211855<br>DT037348 CD012128 DV223642 CD712378 | 20         | -      | hypothetical protein    |
| g6.t1   | CD719843                                                                   | 1          | -      | hypothetical protein    |
| g606.t1 | CD011004 CD720934 DV939246 CD007996<br>CD716477 CF515124                   | 6          | 1e-71  | transposon related gene |
| g609.t1 | CD012065                                                                   | 1          | 5e-28  | transposon related gene |
| g616.t1 | CD713731 CD721638 CD721341 CD010771<br>CD718101                            | 5          | 6e-23  | disease resistance      |
| g618.t1 | CB003499 EC956113 CD012081 CB002610<br>CD004776 DT016580 CD712542 DT024059 | 13         | 1e-15  | C-N bonds formation     |
| g626.t1 | EC973101                                                                   | 1          | -      | hypothetical protein    |
| g628.t1 | CD009921                                                                   | 1          | -      | hypothetical protein    |
| g629.t1 | CA813714 EC962981                                                          | 2          | -      | hypothetical protein    |
| g630.t1 | CB837070 CB838418 CB836315 CB837362<br>CB838867 CB838208 DV223855 CB838862 | 22         | 2e-77  | transposon related gene |
| g636.t1 | CB002985 EC976089 CD719952 CD712662<br>CD718698 CB001173 CD721678 CD006641 | 14         | 2e-39  | transposon related gene |
| g637.t1 | GW838568 CB837726 CD717475 CD715277<br>CA815384 EC953352 CD713560 EE068925 | 9          | 3e-21  | transposon related gene |
| g641.t1 | DT031706 EE077049 DT036167 CB001087<br>CD010393 CD009413 DT037929 DT034937 | 8          | 2e-78  | transposon related gene |
| g643.t1 | CD009921                                                                   | 1          | -      | hypothetical protein    |
| g646.t1 | CD714265 DT032918 DT033157 DT034493<br>DT038048 DT036360 DT038920 CD717537 | 30         | 9e-42  | transposon related gene |
| g651.t1 | CD010393 CB001977                                                          | 2          | 1e-119 | transposon related gene |
| g660.t1 | DT033469 DT033473                                                          | 2          | -      | hypothetical protein    |
| g663.t1 | CF607719                                                                   | 1          | -      | hypothetical protein    |
| g665.t1 | CA814734                                                                   | 1          | 6e-14  | transposon related gene |
| g666.t1 | CF209583                                                                   | 1          | -      | hypothetical protein    |

*continued in next page*



| ID      | ID EST                                                                     | Number EST | Evalue | Description             |
|---------|----------------------------------------------------------------------------|------------|--------|-------------------------|
| g669.t1 | CD012065                                                                   | 1          | -      | hypothetical protein    |
| g670.t1 | CD716394 DT027805 CD006404 CD719246<br>CD718439                            | 5          | -      | hypothetical protein    |
| g671.t1 | CB344928                                                                   | 1          | 2e-25  | disease resistance      |
| g673.t1 | DT039195 CD010771 CD713731 CD721638<br>CD721341 CD718101 DT039156 DT033235 | 8          | 2e-23  | disease resistance      |
| g674.t1 | CB339597                                                                   | 1          | -      | hypothetical protein    |
| g675.t1 | CD713281 CD009597 CD714361 CD012167<br>CD010473 CD721371 CD721302 CD714033 | 32         | 1e-128 | transposon related gene |
| g680.t1 | CF516835                                                                   | 1          | 6e-43  | transposon related gene |
| g682.t1 | DT032522 DT039217 CB001446 EC943740<br>CB005914 CD801065 DT031048 DV223642 | 22         | 7e-61  | transposon related gene |
| g683.t1 | CD010993 CD006379 CD714076 CD717269<br>DT027360 CD719604 CD713186          | 7          | -      | hypothetical protein    |
| g687.t1 | CD006924 CD713612 CD713635 CD713323<br>CD011323 CD010806 CD720084 CD714860 | 18         | -      | hypothetical protein    |
| g689.t1 | CD010754 CD717270 CD721377 CB001223<br>CD714983 CD717025 CB002073 CB004273 | 37         | -      | hypothetical protein    |
| g7.t1   | DT032251                                                                   | 1          | 2e-14  | transposon related gene |
| g70.t1  | CD718824 CD008478 CD714029 CD720786                                        | 4          | 8e-65  | transposon related gene |
| g703.t1 | CB001846                                                                   | 1          | 6e-47  | transposon related gene |
| g706.t1 | CD007346 CD005638                                                          | 3          | -      | hypothetical protein    |
| g709.t1 | EC981317                                                                   | 1          | 9e-19  | methyltransferase       |
| g715.t1 | EC993845                                                                   | 1          | -      | hypothetical protein    |
| g718.t1 | CD010483 CD714710 CD007733 CD716980<br>CD007034                            | 5          | -      | hypothetical protein    |
| g720.t1 | CF202684                                                                   | 1          | 4e-72  | transposon related gene |
| g724.t1 | DT034287                                                                   | 1          | 6e-12  | proteolysis             |
| g725.t1 | GR883822 DV222194 EC958590 EC941828<br>EE104184 CF609205 EC961262 EE085408 | 60         | -      | hypothetical protein    |

*continued in next page*

| ID      | ID EST                                                                     | Number EST | Evalue | Description             |
|---------|----------------------------------------------------------------------------|------------|--------|-------------------------|
| g729.t1 | CB838548 DT032918 DT033157 DT034493<br>CB838418 DT034152 DT038048 DT038920 | 14         | 1e-108 | transposon related gene |
| g733.t1 | CB001087 CB004182 CD004941 CD010393<br>DT029275 CD009413 CB002262 DT028091 | 10         | 1e-103 | transposon related gene |
| g734.t1 | DT030941 DT035229 DT036582 DT031021<br>DT033312 DV224061 DT034303 DT034116 | 13         | 3e-15  | transposon related gene |
| g737.t1 | CD801065 CB837726 DT032772 GW838568<br>DT039217 EC953352 CB005914 EE068925 | 8          | 1e-95  | transposon related gene |
| g742.t1 | CD012081                                                                   | 1          | -      | hypothetical protein    |
| g750.t1 | CB969655                                                                   | 1          | 8e-63  | transposon related gene |
| g760.t1 | CB001087 CD010393 CD009413 DT029275<br>DT029519 DT028091 DT029072 DT026807 | 17         | 2e-55  | transposon related gene |
| g767.t1 | EC932637 EC924251 EC951380 DT028128                                        | 8          | 1e-115 | transposon related gene |
| g768.t1 | DT032522 CB009413 DT039217 CB001446<br>CF211855 EC943740 CB005914 CD012128 | 31         | 2e-48  | transposon related gene |
| g778.t1 | CB003048 DT030995 DT030660 CB002154<br>DT032676                            | 5          | -      | hypothetical protein    |
| g789.t1 | DT037336                                                                   | 1          | 1e-143 | transposon related gene |
| g802.t1 | CD713731                                                                   | 1          | 2e-22  | disease resistance      |
| g811.t1 | DT030740 DT023806 DT038519 CD012156                                        | 7          | -      | hypothetical protein    |
| g812.t1 | CD011948                                                                   | 1          | -      | hypothetical protein    |
| g815.t1 | CD718101                                                                   | 1          | 3e-21  | disease resistance      |
| g83.t1  | DT037334                                                                   | 1          | -      | hypothetical protein    |
| g830.t1 | EC990846 DT031706 EC922392 EC961972<br>CB002015 EE077049 DT028383 DT037170 | 23         | 4e-47  | transposon related gene |
| g834.t1 | CD713281 CD009597 CD714361 CD007134<br>CD718459 CD721371 CD010473 CD720746 | 38         | -      | hypothetical protein    |
| g839.t1 | CD721383 CD721095 CD721314 CD006296<br>CD011236                            | 5          | 1e-15  | transposon related gene |
| g847.t1 | DT033469                                                                   | 1          | -      | hypothetical protein    |
| g848.t1 | CD006199 CD005902 CD007052                                                 | 3          | 4e-84  | transposon related gene |

*continued in next page*

| ID      | ID EST                                                                     | Number EST | Evalue | Description             |
|---------|----------------------------------------------------------------------------|------------|--------|-------------------------|
| g849.t1 | DT029306 DT031564 DT037019 DT028667<br>DT028116 DT028000 AJ862980 DT039172 | 8          | 4e-19  | transposon related gene |
| g853.t1 | CD717058 CD007281 CB004015 CB921102<br>DT011933 DT006280 CB971776 CD007637 | 8          | 4e-42  | transposon related gene |
| g86.t1  | FC061917                                                                   | 1          | 1e-62  | transposon related gene |
| g863.t1 | CD713534 CD721217                                                          | 2          | 8e-42  | transposon related gene |
| g875.t1 | CB009705                                                                   | 1          | 1e-28  | transposon related gene |
| g877.t1 | CB001087 CD004941 CD010393 CD009413<br>CB001977                            | 5          | 1e-115 | transposon related gene |
| g881.t1 | DT037929                                                                   | 1          | 5e-35  | transposon related gene |
| g888.t1 | DT039195 CD010771 CD713731 CD721638<br>CD721341 CD718101 DT039156 DT033235 | 8          | 4e-21  | disease resistance      |
| g89.t1  | DT037468                                                                   | 1          | 5e-94  | transposon related gene |
| g890.t1 | CD009413 CB001977                                                          | 2          | 7e-59  | transposon related gene |
| g903.t1 | CF516529 CF510866 EC919536 CF510953                                        | 4          | 2e-16  | transposon related gene |
| g911.t1 | CD006924 CD713612 CD713635 CD713323<br>CD011323 CD010806 CD720084 CD714860 | 18         | -      | hypothetical protein    |
| g914.t1 | CF518571 CB980117 CB979782 CB979848<br>CB980047                            | 5          | -      | hypothetical protein    |
| g920.t1 | CB002829 CD715356 CD716409 CD716707<br>CF403552 CD716271 CD011052 CD008240 | 17         | -      | hypothetical protein    |
| g923.t1 | CD713731 CD721638 CD010771 CD721341<br>CD718101                            | 6          | 7e-23  | disease resistance      |
| g925.t1 | CD006924 CD713612 CD713635 CD713323<br>CD011323 CD010806 CD720084 CD714860 | 18         | -      | hypothetical protein    |
| g927.t1 | CD714821 EC941953 CD004991 EC948760<br>CB834319 CD011004 CD713014 CD720934 | 13         | -      | hypothetical protein    |
| g929.t1 | FC061917                                                                   | 1          | 1e-75  | transposon related gene |
| g933.t1 | CD713151 CD008711 CD011033 CD714203<br>CD714469 CA813714 CD721302 CA812635 | 14         | 3e-77  | transposon related gene |

*continued in next page*

| ID      | ID EST                                                                     | Number EST | Evalue | Description             |
|---------|----------------------------------------------------------------------------|------------|--------|-------------------------|
| g935.t1 | CD714297 CD715108 CB838198 CB839234<br>CB839640 CD715576 CB834167 CB834953 | 18         | 3e-20  | disease resistance      |
| g938.t1 | CB003499 EC956113 CD012081 CD004776<br>CB002610 DT016580 CD712542 DT024059 | 9          | -      | hypothetical protein    |
| g942.t1 | DT030687                                                                   | 1          | -      | hypothetical protein    |
| g946.t1 | CD713281 CD009597 CD714361 CD718459<br>CD007134 CD721371 CD010473 CD714033 | 20         | 4e-48  | transposon related gene |
| g949.t1 | EV236146 EY255022 EV236147                                                 | 3          | -      | hypothetical protein    |
| g950.t1 | CB003460 CB002018                                                          | 2          | 6e-23  | transposon related gene |
| g956.t1 | CB002401 CD718195 CD719536 CF516940<br>CD008478 EE082713 CD714029 CD718824 | 13         | 5e-17  | transposon related gene |
| g96.t1  | CB835786 CB835999 EC981476 CB839577                                        | 4          | 7e-17  | transposon related gene |
| g960.t1 | DT035926 EC940346                                                          | 2          | 7e-30  | transposon related gene |
| g970.t1 | DT036146                                                                   | 1          | -      | hypothetical protein    |
| g971.t1 | CB002815 DT031718 CB009413 CA813085<br>CF211855 CF604839 DV939454 CB003716 | 10         | 2e-41  | transposon related gene |
| g974.t1 | CD713151 CD008711 CD011033 CD714203<br>CD721302 CD714469 CA812635 CD720404 | 13         | 6e-86  | transposon related gene |
| g976.t1 | DV223882 DT038280                                                          | 2          | -      | hypothetical protein    |
| g982.t1 | DT039195 DT033235 DT039156                                                 | 3          | -      | hypothetical protein    |
| g985.t1 | CD713731 CD721638 CD721341 CD010771<br>CD718101                            | 5          | -      | hypothetical protein    |
| g99.t1  | DT027895 CB343271 DT031935 DT037757<br>DT031658 DT027322 CB004174 CD006551 | 9          | 1e-120 | transposon related gene |
| g992.t1 | DT030687                                                                   | 1          | -      | hypothetical protein    |
