# Supplementary material for: Whole genome comparison between table and wine grapes reveals a comprehensive catalog of structural variants
Source: PubMed Central journal article supplement (PMC3890619; doi:10.1186/1471-2229-14-7), 2014-01-07
Supplement: 1471-2229-14-7-S3.pdf [file 1471-2229-14-7-S3.pdf]

**Supplementary Table 2** – Homozygous and heterozygous variations classification: SNPs and INDELs were classified into homozygous or heterozygous variants based on the reads supporting each variation and the contig it belongs.

|                     | <b>SNPs</b> | <b>Insertions</b> | <b>Deletions</b> |
|---------------------|-------------|-------------------|------------------|
| <b>Homozygous</b>   | 525,072     | 136,795           | 121,880          |
| <b>Heterozygous</b> | 668,494     | 174,060           | 190,268          |
| <b>Total</b>        | 1,193,566   | 310,855           | 312,148          |
