# Supplementary material for: Whole genome comparison between table and wine grapes reveals a comprehensive catalog of structural variants
Source: PubMed Central journal article supplement (PMC3890619; doi:10.1186/1471-2229-14-7), 2014-01-07
Supplement: 1471-2229-14-7-S4.pdf [file 1471-2229-14-7-S4.pdf]

**Supplementary Table 3** – Distribution of SNPs and INDELs across different regions of the genome.

| <b>Region</b>        | <b>SNPs (%)</b> | <b>INDELs (%)</b> |
|----------------------|-----------------|-------------------|
| Intergenic           | 37.60           | 41.53             |
| Intron               | 31.62           | 27.67             |
| Upstream             | 11.91           | 15.47             |
| Downstream           | 12.93           | 14.27             |
| Exon                 | 5.91            | 0.96              |
| Splice_Site_Donor    | 0.02            | 0.05              |
| Splice_Site_Acceptor | 0.02            | 0.05              |
