# Supplementary material for: Whole genome comparison between table and wine grapes reveals a comprehensive catalog of structural variants
Source: PubMed Central journal article supplement (PMC3890619; doi:10.1186/1471-2229-14-7), 2014-01-07
Supplement: 1471-2229-14-7-S5.pdf [file 1471-2229-14-7-S5.pdf]

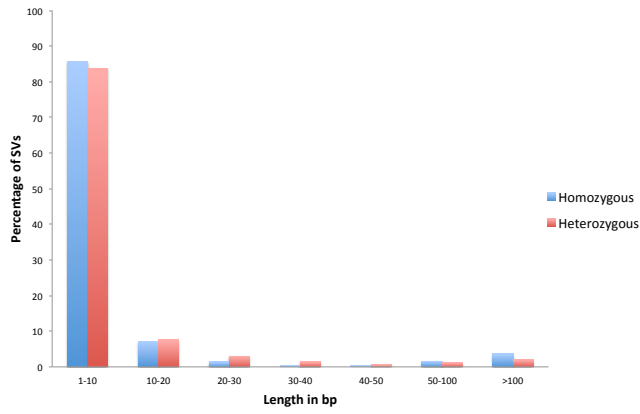

**Supplementary Figure 2:** Length Distribution of Structural Variants (SVs). Frequency of homozygous and heterozygous SVs in ‘Sultanina’ genome according to their length.

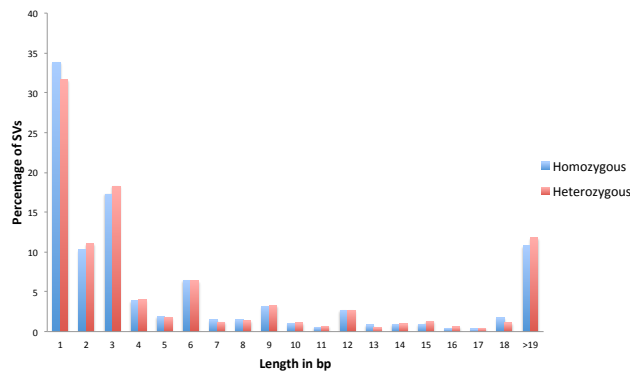

**Supplementary Figure 3:** Structural variants in CDS. Frequency of homozygous and heterozygous SVs in coding sequences of ‘Sultanina’ genome according to their length.
