# Supplementary material for: Whole genome comparison between table and wine grapes reveals a comprehensive catalog of structural variants
Source: PubMed Central journal article supplement (PMC3890619; doi:10.1186/1471-2229-14-7), 2014-01-07
Supplement: 1471-2229-14-7-S6.pdf [file 1471-2229-14-7-S6.pdf]

**Supplementary Table 4** – SNPs in ‘Sultanina’ genes that present dN/dS ratio (nonsynonymous-to-synonymous substitutions) higher than 1 and their respective best homologue in *Arabidopsis thaliana*. These genes are considered as rapidly evolving genes.

| <b>Gene ID</b>    | <b>Number Exon SNPs</b> | <b>Non Synonymous SNPs</b> | <b>Synonymous SNPs</b> | <b>dN/dS ratio</b> | <b><i>Arabidopsis</i> best homologue</b> |
|-------------------|-------------------------|----------------------------|------------------------|--------------------|------------------------------------------|
| GSVIVG01000034001 | 14                      | 8                          | 6                      | 1.33333            | AT3G05240                                |
| GSVIVG01000040001 | 18                      | 13                         | 5                      | 2.6                | AT1G54920                                |
| GSVIVG01000084001 | 17                      | 9                          | 8                      | 1.125              | AT1G55020                                |
| GSVIVG01000089001 | 18                      | 12                         | 6                      | 2                  | AT3G21430                                |
| GSVIVG01000093001 | 11                      | 8                          | 3                      | 2.66667            | AT3G62900                                |
| GSVIVG01000200001 | 14                      | 12                         | 2                      | 6                  | AT5G24010                                |
| GSVIVG01000211001 | 10                      | 8                          | 2                      | 4                  | AT5G24010                                |
| GSVIVG01000212001 | 14                      | 8                          | 6                      | 1.33333            | AT2G23200                                |
| GSVIVG01000237001 | 11                      | 8                          | 3                      | 2.66667            | AT5G17270                                |
| GSVIVG01000262001 | 18                      | 12                         | 6                      | 2                  | AT5G49160                                |
| GSVIVG01000572001 | 10                      | 7                          | 3                      | 2.33333            | AT1G13120                                |
| GSVIVG01000596001 | 18                      | 12                         | 6                      | 2                  | AT5G37190                                |
| GSVIVG01000646001 | 22                      | 15                         | 7                      | 2.14286            | AT3G14470                                |
| GSVIVG01000655001 | 12                      | 10                         | 2                      | 5                  | AT3G14470                                |
| GSVIVG01000657001 | 14                      | 8                          | 5                      | 1.6                | AT3G14470                                |
| GSVIVG01000682001 | 11                      | 9                          | 2                      | 4.5                | AT1G17120                                |

*continued in next page*

| <b>Gene ID</b>    | <b>Number Exon SNPs</b> | <b>Non Synonymous SNPs</b> | <b>Synonymous SNPs</b> | <b>dN/dS ratio</b> | <b><i>Arabidopsis</i> best homologue</b> |
|-------------------|-------------------------|----------------------------|------------------------|--------------------|------------------------------------------|
| GSVIVG01000809001 | 10                      | 6                          | 4                      | 1.5                |                                          |
| GSVIVG01000848001 | 11                      | 6                          | 5                      | 1.2                | AT5G50400                                |
| GSVIVG01000871001 | 11                      | 9                          | 2                      | 4.5                | AT3G14470                                |
| GSVIVG01000961001 | 10                      | 7                          | 3                      | 2.33333            | AT5G13210                                |
| GSVIVG01001003001 | 14                      | 9                          | 5                      | 1.8                | AT5G22450                                |
| GSVIVG01001186001 | 10                      | 6                          | 4                      | 1.5                | AT1G03100                                |
| GSVIVG01001195001 | 11                      | 6                          | 5                      | 1.2                | AT4G02710                                |
| GSVIVG01001399001 | 12                      | 8                          | 4                      | 2                  | AT5G60900                                |
| GSVIVG01001429001 | 14                      | 9                          | 5                      | 1.8                | AT3G14470                                |
| GSVIVG01001457001 | 10                      | 8                          | 1                      | 8                  | AT3G14470                                |
| GSVIVG01001469001 | 13                      | 9                          | 4                      | 2.25               | AT3G14470                                |
| GSVIVG01001478001 | 10                      | 7                          | 3                      | 2.33333            | AT3G23900                                |
| GSVIVG01001656001 | 14                      | 9                          | 4                      | 2.25               | AT3G47570                                |
| GSVIVG01001790001 | 11                      | 8                          | 2                      | 4                  | AT5G36930                                |
| GSVIVG01001802001 | 15                      | 11                         | 4                      | 2.75               | AT2G34930                                |
| GSVIVG01001941001 | 10                      | 6                          | 4                      | 1.5                | AT2G27040                                |
| GSVIVG01001943001 | 10                      | 6                          | 4                      | 1.5                | AT1G20780                                |
| GSVIVG01002253001 | 11                      | 8                          | 3                      | 2.66667            | AT3G47570                                |
| GSVIVG01002259001 | 11                      | 6                          | 5                      | 1.2                | AT5G65110                                |
| GSVIVG01003592001 | 10                      | 6                          | 1                      | 6                  | AT1G04730                                |
| GSVIVG01003820001 | 12                      | 9                          | 3                      | 3                  | AT3G51430                                |
| GSVIVG01004064001 | 10                      | 9                          | 1                      | 9                  | AT3G14470                                |
| GSVIVG01004105001 | 16                      | 11                         | 5                      | 2.2                | AT5G43470                                |

*continued in next page*

| <b>Gene ID</b>    | <b>Number Exon SNPs</b> | <b>Non Synonymous SNPs</b> | <b>Synonymous SNPs</b> | <b>dN/dS ratio</b> | <b><i>Arabidopsis</i> best homologue</b> |
|-------------------|-------------------------|----------------------------|------------------------|--------------------|------------------------------------------|
| GSVIVG01004860001 | 14                      | 9                          | 5                      | 1.8                | AT2G22300                                |
| GSVIVG01005211001 | 12                      | 7                          | 5                      | 1.4                | AT4G04960                                |
| GSVIVG01005272001 | 10                      | 7                          | 2                      | 3.5                | AT1G61680                                |
| GSVIVG01006004001 | 15                      | 9                          | 6                      | 1.5                | AT2G31900                                |
| GSVIVG01006342001 | 11                      | 6                          | 5                      | 1.2                | AT1G61120                                |
| GSVIVG01006449001 | 11                      | 7                          | 4                      | 1.75               | AT1G11060                                |
| GSVIVG01006478001 | 12                      | 7                          | 5                      | 1.4                | AT1G11340                                |
| GSVIVG01006968001 | 11                      | 6                          | 5                      | 1.2                | AT2G04160                                |
| GSVIVG01006970001 | 12                      | 7                          | 5                      | 1.4                | AT2G04160                                |
| GSVIVG01006973001 | 11                      | 9                          | 1                      | 9                  | AT5G59810                                |
| GSVIVG01007009001 | 13                      | 7                          | 6                      | 1.16667            | AT3G63380                                |
| GSVIVG01007026001 | 14                      | 10                         | 4                      | 2.5                | AT3G14460                                |
| GSVIVG01007576001 | 10                      | 7                          | 3                      | 2.33333            | AT5G50280                                |
| GSVIVG01007656001 | 14                      | 8                          | 6                      | 1.33333            | AT5G50170                                |
| GSVIVG01007681001 | 12                      | 7                          | 5                      | 1.4                | AT5G40390                                |
| GSVIVG01007718001 | 12                      | 7                          | 5                      | 1.4                | AT3G48200                                |
| GSVIVG01007793001 | 11                      | 6                          | 5                      | 1.2                | AT5G40250                                |
| GSVIVG01007806001 | 11                      | 6                          | 5                      | 1.2                | AT3G48050                                |
| GSVIVG01007852001 | 10                      | 8                          | 2                      | 4                  | AT3G48090                                |
| GSVIVG01007974001 | 10                      | 7                          | 3                      | 2.33333            | AT5G61400                                |
| GSVIVG01008086001 | 13                      | 8                          | 5                      | 1.6                | AT1G74790                                |
| GSVIVG01008206001 | 15                      | 8                          | 7                      | 1.14286            | AT5G23080                                |
| GSVIVG01008212001 | 10                      | 6                          | 4                      | 1.5                | AT1G69730                                |

*continued in next page*

| <b>Gene ID</b>    | <b>Number Exon SNPs</b> | <b>Non Synonymous SNPs</b> | <b>Synonymous SNPs</b> | <b>dN/dS ratio</b> | <b><i>Arabidopsis</i> best homologue</b> |
|-------------------|-------------------------|----------------------------|------------------------|--------------------|------------------------------------------|
| GSVIVG01008327001 | 14                      | 9                          | 5                      | 1.8                | AT1G18390                                |
| GSVIVG01008328001 | 13                      | 7                          | 6                      | 1.16667            | AT1G67000                                |
| GSVIVG01008357001 | 13                      | 9                          | 4                      | 2.25               | AT3G14460                                |
| GSVIVG01008395001 | 13                      | 7                          | 5                      | 1.4                | AT3G18100                                |
| GSVIVG01008435001 | 10                      | 6                          | 4                      | 1.5                | AT4G08850                                |
| GSVIVG01008436001 | 23                      | 13                         | 10                     | 1.3                | AT4G08850                                |
| GSVIVG01008515001 | 20                      | 11                         | 9                      | 1.22222            | AT5G63420                                |
| GSVIVG01008603001 | 26                      | 17                         | 9                      | 1.88889            | AT3G48770                                |
| GSVIVG01008693001 | 10                      | 7                          | 3                      | 2.33333            | AT1G20510                                |
| GSVIVG01008780001 | 12                      | 7                          | 5                      | 1.4                | AT1G21270                                |
| GSVIVG01008802001 | 22                      | 17                         | 5                      | 3.4                | AT1G21580                                |
| GSVIVG01008814001 | 12                      | 7                          | 5                      | 1.4                | AT1G21650                                |
| GSVIVG01008835001 | 10                      | 6                          | 4                      | 1.5                | AT1G77410                                |
| GSVIVG01008880001 | 12                      | 7                          | 4                      | 1.75               | AT1G77620                                |
| GSVIVG01008904001 | 16                      | 9                          | 7                      | 1.28571            | AT1G77680                                |
| GSVIVG01008914001 | 11                      | 6                          | 5                      | 1.2                | AT5G08640                                |
| GSVIVG01008944001 | 15                      | 8                          | 7                      | 1.14286            | AT1G77800                                |
| GSVIVG01009151001 | 14                      | 9                          | 5                      | 1.8                | AT4G24580                                |
| GSVIVG01009192001 | 12                      | 7                          | 5                      | 1.4                | AT4G24480                                |
| GSVIVG01009199001 | 14                      | 9                          | 5                      | 1.8                | AT1G58250                                |
| GSVIVG01009279001 | 30                      | 21                         | 9                      | 2.33333            | AT3G48770                                |
| GSVIVG01009356001 | 10                      | 7                          | 3                      | 2.33333            | AT1G27750                                |
| GSVIVG01009407001 | 17                      | 11                         | 6                      | 1.83333            | AT2G27610                                |

*continued in next page*

| <b>Gene ID</b>    | <b>Number Exon SNPs</b> | <b>Non Synonymous SNPs</b> | <b>Synonymous SNPs</b> | <b>dN/dS ratio</b> | <b><i>Arabidopsis</i> best homologue</b> |
|-------------------|-------------------------|----------------------------|------------------------|--------------------|------------------------------------------|
| GSVIVG01009607001 | 12                      | 7                          | 5                      | 1.4                | AT4G31940                                |
| GSVIVG01009687001 | 11                      | 6                          | 5                      | 1.2                | AT1G75150                                |
| GSVIVG01009854001 | 12                      | 9                          | 3                      | 3                  | AT4G31500                                |
| GSVIVG01010123001 | 15                      | 8                          | 7                      | 1.14286            | AT1G68940                                |
| GSVIVG01010127001 | 10                      | 7                          | 3                      | 2.33333            | AT1G68910                                |
| GSVIVG01010251001 | 19                      | 10                         | 9                      | 1.11111            | AT1G65810                                |
| GSVIVG01010254001 | 16                      | 10                         | 6                      | 1.66667            | AT1G65810                                |
| GSVIVG01010295001 | 16                      | 10                         | 6                      | 1.66667            | AT1G24460                                |
| GSVIVG01010326001 | 18                      | 9                          | 8                      | 1.125              | AT3G13080                                |
| GSVIVG01010800001 | 15                      | 10                         | 4                      | 2.5                | AT5G45540                                |
| GSVIVG01010830001 | 12                      | 9                          | 2                      | 4.5                | AT3G46710                                |
| GSVIVG01010834001 | 18                      | 12                         | 7                      | 1.71429            | AT3G46710                                |
| GSVIVG01011193001 | 10                      | 7                          | 3                      | 2.33333            | AT3G14470                                |
| GSVIVG01011204001 | 10                      | 8                          | 2                      | 4                  | AT5G04700                                |
| GSVIVG01011216001 | 10                      | 8                          | 2                      | 4                  | AT3G18670                                |
| GSVIVG01011361001 | 10                      | 6                          | 4                      | 1.5                |                                          |
| GSVIVG01011363001 | 21                      | 12                         | 9                      | 1.33333            |                                          |
| GSVIVG01011373001 | 10                      | 7                          | 3                      | 2.33333            | AT4G08850                                |
| GSVIVG01011494001 | 10                      | 8                          | 2                      | 4                  | AT3G29290                                |
| GSVIVG01011620001 | 11                      | 6                          | 5                      | 1.2                | AT1G34300                                |
| GSVIVG01011645001 | 16                      | 12                         | 4                      | 3                  | AT1G14790                                |
| GSVIVG01011677001 | 12                      | 8                          | 4                      | 2                  | AT3G17840                                |
| GSVIVG01011849001 | 11                      | 7                          | 2                      | 3.5                | AT1G18390                                |

*continued in next page*

| <b>Gene ID</b>    | <b>Number Exon SNPs</b> | <b>Non Synonymous SNPs</b> | <b>Synonymous SNPs</b> | <b>dN/dS ratio</b> | <b><i>Arabidopsis</i> best homologue</b> |
|-------------------|-------------------------|----------------------------|------------------------|--------------------|------------------------------------------|
| GSVIVG01011854001 | 11                      | 9                          | 2                      | 4.5                | AT5G38260                                |
| GSVIVG01011972001 | 10                      | 7                          | 3                      | 2.33333            | AT1G68790                                |
| GSVIVG01012068001 | 28                      | 18                         | 10                     | 1.8                | AT4G19900                                |
| GSVIVG01012167001 | 11                      | 6                          | 5                      | 1.2                | AT3G07040                                |
| GSVIVG01012168001 | 16                      | 10                         | 5                      | 2                  | AT3G07040                                |
| GSVIVG01012169001 | 17                      | 11                         | 6                      | 1.83333            | AT3G07040                                |
| GSVIVG01012174001 | 11                      | 6                          | 5                      | 1.2                | AT2G03380                                |
| GSVIVG01012245001 | 11                      | 7                          | 4                      | 1.75               | AT1G26330                                |
| GSVIVG01012377001 | 17                      | 10                         | 7                      | 1.42857            | AT1G65440                                |
| GSVIVG01012514001 | 10                      | 6                          | 4                      | 1.5                | AT5G64390                                |
| GSVIVG01012613001 | 10                      | 9                          | 1                      | 9                  | ATCG01110                                |
| GSVIVG01012618001 | 11                      | 7                          | 4                      | 1.75               | AT4G05200                                |
| GSVIVG01012662001 | 10                      | 8                          | 2                      | 4                  | AT3G21630                                |
| GSVIVG01012724001 | 13                      | 7                          | 6                      | 1.16667            | AT1G64570                                |
| GSVIVG01012762001 | 11                      | 9                          | 2                      | 4.5                | AT5G17680                                |
| GSVIVG01013164001 | 16                      | 10                         | 6                      | 1.66667            | AT3G02890                                |
| GSVIVG01013255001 | 10                      | 6                          | 4                      | 1.5                | AT1G17020                                |
| GSVIVG01013370001 | 11                      | 7                          | 4                      | 1.75               | AT1G76350                                |
| GSVIVG01013406001 | 10                      | 6                          | 4                      | 1.5                | AT1G61560                                |
| GSVIVG01013416001 | 13                      | 7                          | 5                      | 1.4                | AT2G13600                                |
| GSVIVG01013451001 | 14                      | 9                          | 5                      | 1.8                | AT1G20970                                |
| GSVIVG01013571001 | 12                      | 9                          | 3                      | 3                  | AT1G06710                                |
| GSVIVG01013995001 | 11                      | 9                          | 2                      | 4.5                | AT3G11080                                |

*continued in next page*

| <b>Gene ID</b>    | <b>Number Exon SNPs</b> | <b>Non Synonymous SNPs</b> | <b>Synonymous SNPs</b> | <b>dN/dS ratio</b> | <b><i>Arabidopsis</i> best homologue</b> |
|-------------------|-------------------------|----------------------------|------------------------|--------------------|------------------------------------------|
| GSVIVG01014028001 | 10                      | 7                          | 3                      | 2.33333            | AT5G37630                                |
| GSVIVG01014110001 | 11                      | 7                          | 4                      | 1.75               | AT3G14840                                |
| GSVIVG01014128001 | 16                      | 10                         | 6                      | 1.66667            | AT3G14840                                |
| GSVIVG01014138001 | 17                      | 10                         | 7                      | 1.42857            | AT1G53440                                |
| GSVIVG01014147001 | 12                      | 10                         | 2                      | 5                  | AT1G53440                                |
| GSVIVG01014244001 | 14                      | 8                          | 6                      | 1.33333            | AT4G35290                                |
| GSVIVG01014328001 | 10                      | 6                          | 4                      | 1.5                | AT2G19130                                |
| GSVIVG01014344001 | 19                      | 11                         | 8                      | 1.375              | AT4G21700                                |
| GSVIVG01014347001 | 13                      | 10                         | 3                      | 3.33333            | AT4G21700                                |
| GSVIVG01014437001 | 11                      | 6                          | 5                      | 1.2                | AT5G54280                                |
| GSVIVG01014499001 | 10                      | 7                          | 3                      | 2.33333            | AT4G27290                                |
| GSVIVG01014500001 | 22                      | 16                         | 6                      | 2.66667            | AT4G27290                                |
| GSVIVG01014512001 | 14                      | 8                          | 6                      | 1.33333            | AT4G27290                                |
| GSVIVG01014632001 | 14                      | 10                         | 4                      | 2.5                | AT3G13080                                |
| GSVIVG01014692001 | 26                      | 15                         | 11                     | 1.36364            | AT5G55820                                |
| GSVIVG01014743001 | 10                      | 6                          | 4                      | 1.5                | AT3G13225                                |
| GSVIVG01015020001 | 22                      | 13                         | 9                      | 1.44444            | AT2G03140                                |
| GSVIVG01015198001 | 12                      | 7                          | 5                      | 1.4                | AT5G56890                                |
| GSVIVG01015233001 | 12                      | 6                          | 5                      | 1.2                | AT4G18750                                |
| GSVIVG01015313001 | 17                      | 10                         | 7                      | 1.42857            | AT2G19930                                |
| GSVIVG01015314001 | 11                      | 9                          | 2                      | 4.5                | AT2G19950                                |
| GSVIVG01015394001 | 18                      | 13                         | 5                      | 2.6                | AT3G46530                                |
| GSVIVG01015461001 | 26                      | 14                         | 12                     | 1.16667            | AT1G15520                                |

*continued in next page*

| <b>Gene ID</b>    | <b>Number Exon SNPs</b> | <b>Non Synonymous SNPs</b> | <b>Synonymous SNPs</b> | <b>dN/dS ratio</b> | <b><i>Arabidopsis</i> best homologue</b> |
|-------------------|-------------------------|----------------------------|------------------------|--------------------|------------------------------------------|
| GSVIVG01015494001 | 11                      | 6                          | 5                      | 1.2                | AT5G57610                                |
| GSVIVG01015521001 | 10                      | 7                          | 3                      | 2.33333            | AT4G32430                                |
| GSVIVG01015533001 | 12                      | 8                          | 4                      | 2                  | AT2G41480                                |
| GSVIVG01015591001 | 10                      | 8                          | 2                      | 4                  |                                          |
| GSVIVG01015601001 | 28                      | 20                         | 8                      | 2.5                | AT2G25320                                |
| GSVIVG01015659001 | 13                      | 9                          | 4                      | 2.25               | AT1G47890                                |
| GSVIVG01015664001 | 12                      | 8                          | 4                      | 2                  | AT5G45500                                |
| GSVIVG01015707001 | 10                      | 6                          | 4                      | 1.5                | AT1G53350                                |
| GSVIVG01015767001 | 10                      | 7                          | 3                      | 2.33333            | AT1G17840                                |
| GSVIVG01015778001 | 12                      | 8                          | 4                      | 2                  | AT5G45520                                |
| GSVIVG01015799001 | 10                      | 7                          | 3                      | 2.33333            | AT4G23180                                |
| GSVIVG01015960001 | 10                      | 8                          | 2                      | 4                  | AT2G07680                                |
| GSVIVG01016019001 | 12                      | 7                          | 5                      | 1.4                | AT1G58190                                |
| GSVIVG01016080001 | 17                      | 13                         | 3                      | 4.33333            | AT5G20480                                |
| GSVIVG01016161001 | 10                      | 7                          | 3                      | 2.33333            | AT1G22060                                |
| GSVIVG01016204001 | 14                      | 8                          | 6                      | 1.33333            |                                          |
| GSVIVG01016246001 | 17                      | 9                          | 8                      | 1.125              | AT5G04240                                |
| GSVIVG01016247001 | 10                      | 7                          | 3                      | 2.33333            | AT3G60750                                |
| GSVIVG01016281001 | 10                      | 7                          | 3                      | 2.33333            | AT5G14990                                |
| GSVIVG01016296001 | 10                      | 6                          | 4                      | 1.5                | AT2G39190                                |
| GSVIVG01016490001 | 11                      | 7                          | 4                      | 1.75               | AT5G60020                                |
| GSVIVG01016522001 | 12                      | 9                          | 3                      | 3                  | AT2G37650                                |
| GSVIVG01016757001 | 10                      | 8                          | 1                      | 8                  | AT5G45540                                |

*continued in next page*



| <b>Gene ID</b>    | <b>Number Exon SNPs</b> | <b>Non Synonymous SNPs</b> | <b>Synonymous SNPs</b> | <b>dN/dS ratio</b> | <b><i>Arabidopsis</i> best homologue</b> |
|-------------------|-------------------------|----------------------------|------------------------|--------------------|------------------------------------------|
| GSVIVG01016771001 | 11                      | 6                          | 5                      | 1.2                | AT1G59453                                |
| GSVIVG01016794001 | 64                      | 37                         | 27                     | 1.37037            | AT1G67120                                |
| GSVIVG01016855001 | 11                      | 7                          | 4                      | 1.75               | AT1G72960                                |
| GSVIVG01016876001 | 11                      | 6                          | 5                      | 1.2                | AT1G55180                                |
| GSVIVG01016905001 | 10                      | 7                          | 3                      | 2.33333            | AT2G25930                                |
| GSVIVG01016922001 | 10                      | 8                          | 2                      | 4                  | AT4G29990                                |
| GSVIVG01016925001 | 13                      | 7                          | 6                      | 1.16667            | AT4G29990                                |
| GSVIVG01016933001 | 13                      | 7                          | 6                      | 1.16667            | AT2G19210                                |
| GSVIVG01016948001 | 13                      | 8                          | 5                      | 1.6                | AT4G29990                                |
| GSVIVG01017026001 | 15                      | 10                         | 4                      | 2.5                | AT1G12220                                |
| GSVIVG01017044001 | 15                      | 8                          | 7                      | 1.14286            | AT3G16230                                |
| GSVIVG01017079001 | 11                      | 8                          | 3                      | 2.66667            | AT1G12220                                |
| GSVIVG01017117001 | 13                      | 9                          | 4                      | 2.25               | AT5G63870                                |
| GSVIVG01017152001 | 15                      | 11                         | 4                      | 2.75               | AT1G15660                                |
| GSVIVG01017185001 | 23                      | 13                         | 10                     | 1.3                | AT1G15520                                |
| GSVIVG01017187001 | 18                      | 10                         | 7                      | 1.42857            | AT1G15520                                |
| GSVIVG01017195001 | 15                      | 10                         | 4                      | 2.5                | AT1G15520                                |
| GSVIVG01017198001 | 15                      | 10                         | 5                      | 2                  | AT1G15520                                |
| GSVIVG01017205001 | 21                      | 14                         | 7                      | 2                  | AT1G52780                                |
| GSVIVG01017208001 | 10                      | 7                          | 3                      | 2.33333            | AT3G15550                                |
| GSVIVG01017229001 | 12                      | 11                         | 1                      | 11                 | AT1G12210                                |
| GSVIVG01017326001 | 10                      | 9                          | 1                      | 9                  | AT4G32300                                |
| GSVIVG01017332001 | 10                      | 5                          | 4                      | 1.25               | AT5G20230                                |

*continued in next page*

| <b>Gene ID</b>    | <b>Number Exon SNPs</b> | <b>Non Synonymous SNPs</b> | <b>Synonymous SNPs</b> | <b>dN/dS ratio</b> | <b><i>Arabidopsis</i> best homologue</b> |
|-------------------|-------------------------|----------------------------|------------------------|--------------------|------------------------------------------|
| GSVIVG01017378001 | 11                      | 6                          | 5                      | 1.2                | AT1G11290                                |
| GSVIVG01017399001 | 10                      | 7                          | 3                      | 2.33333            | AT1G07390                                |
| GSVIVG01017518001 | 14                      | 9                          | 5                      | 1.8                | AT1G17230                                |
| GSVIVG01017736001 | 17                      | 11                         | 6                      | 1.83333            | AT4G02510                                |
| GSVIVG01017765001 | 11                      | 7                          | 4                      | 1.75               | AT3G62900                                |
| GSVIVG01017821001 | 10                      | 6                          | 4                      | 1.5                |                                          |
| GSVIVG01017825001 | 17                      | 9                          | 8                      | 1.125              | AT4G03130                                |
| GSVIVG01017952001 | 10                      | 6                          | 4                      | 1.5                | AT1G31690                                |
| GSVIVG01018065001 | 43                      | 24                         | 19                     | 1.26316            | AT3G22910                                |
| GSVIVG01018103001 | 10                      | 6                          | 4                      | 1.5                | AT5G43670                                |
| GSVIVG01018116001 | 11                      | 8                          | 3                      | 2.66667            | AT1G06750                                |
| GSVIVG01018143001 | 13                      | 8                          | 5                      | 1.6                | AT4G24000                                |
| GSVIVG01018154001 | 11                      | 6                          | 5                      | 1.2                | AT4G00060                                |
| GSVIVG01018404001 | 11                      | 7                          | 4                      | 1.75               | AT1G08840                                |
| GSVIVG01018516001 | 10                      | 8                          | 2                      | 4                  | AT5G62370                                |
| GSVIVG01018682001 | 11                      | 5                          | 4                      | 1.25               | AT2G34930                                |
| GSVIVG01018715001 | 11                      | 6                          | 4                      | 1.5                | AT5G62410                                |
| GSVIVG01018797001 | 12                      | 9                          | 3                      | 3                  | AT1G19835                                |
| GSVIVG01018890001 | 11                      | 6                          | 5                      | 1.2                | AT3G50930                                |
| GSVIVG01019029001 | 10                      | 8                          | 2                      | 4                  | AT2G01390                                |
| GSVIVG01019052001 | 16                      | 9                          | 7                      | 1.28571            | AT3G03300                                |
| GSVIVG01019397001 | 12                      | 9                          | 2                      | 4.5                |                                          |
| GSVIVG01019408001 | 10                      | 8                          | 2                      | 4                  | AT4G21300                                |

*continued in next page*

| <b>Gene ID</b>    | <b>Number Exon SNPs</b> | <b>Non Synonymous SNPs</b> | <b>Synonymous SNPs</b> | <b>dN/dS ratio</b> | <b><i>Arabidopsis</i> best homologue</b> |
|-------------------|-------------------------|----------------------------|------------------------|--------------------|------------------------------------------|
| GSVIVG01019421001 | 20                      | 11                         | 9                      | 1.22222            | AT4G11270                                |
| GSVIVG01019459001 | 10                      | 6                          | 4                      | 1.5                | AT5G41610                                |
| GSVIVG01019467001 | 22                      | 12                         | 10                     | 1.2                | AT3G59140                                |
| GSVIVG01019469001 | 19                      | 12                         | 7                      | 1.71429            | AT3G59140                                |
| GSVIVG01019471001 | 22                      | 14                         | 8                      | 1.75               | AT3G59140                                |
| GSVIVG01019499001 | 13                      | 7                          | 6                      | 1.16667            | AT5G41790                                |
| GSVIVG01019572001 | 10                      | 6                          | 4                      | 1.5                | AT4G23990                                |
| GSVIVG01019581001 | 10                      | 6                          | 4                      | 1.5                | AT4G23990                                |
| GSVIVG01019583001 | 11                      | 8                          | 3                      | 2.66667            | AT4G23990                                |
| GSVIVG01019584001 | 11                      | 9                          | 2                      | 4.5                | AT4G23990                                |
| GSVIVG01019686001 | 25                      | 17                         | 8                      | 2.125              | AT4G10540                                |
| GSVIVG01019761001 | 15                      | 8                          | 6                      | 1.33333            | AT1G63490                                |
| GSVIVG01019819001 | 10                      | 6                          | 4                      | 1.5                | AT4G11720                                |
| GSVIVG01019821001 | 10                      | 6                          | 4                      | 1.5                | AT4G23050                                |
| GSVIVG01019855001 | 12                      | 10                         | 2                      | 5                  | AT5G62090                                |
| GSVIVG01020084001 | 10                      | 8                          | 2                      | 4                  | AT1G69870                                |
| GSVIVG01020123001 | 11                      | 6                          | 5                      | 1.2                | AT1G27180                                |
| GSVIVG01020267001 | 10                      | 8                          | 1                      | 8                  | AT5G63020                                |
| GSVIVG01020334001 | 12                      | 8                          | 4                      | 2                  | AT3G28890                                |
| GSVIVG01020729001 | 11                      | 8                          | 3                      | 2.66667            | AT3G47090                                |
| GSVIVG01020732001 | 11                      | 8                          | 3                      | 2.66667            | AT3G47090                                |
| GSVIVG01020735001 | 11                      | 8                          | 3                      | 2.66667            | AT3G47090                                |
| GSVIVG01020897001 | 10                      | 7                          | 3                      | 2.33333            | AT3G47570                                |

*continued in next page*

| <b>Gene ID</b>    | <b>Number Exon SNPs</b> | <b>Non Synonymous SNPs</b> | <b>Synonymous SNPs</b> | <b>dN/dS ratio</b> | <b><i>Arabidopsis</i> best homologue</b> |
|-------------------|-------------------------|----------------------------|------------------------|--------------------|------------------------------------------|
| GSVIVG01020902001 | 12                      | 7                          | 5                      | 1.4                | AT1G03670                                |
| GSVIVG01020920001 | 36                      | 21                         | 14                     | 1.5                | AT4G13750                                |
| GSVIVG01020936001 | 12                      | 7                          | 5                      | 1.4                | AT1G06720                                |
| GSVIVG01021053001 | 11                      | 7                          | 3                      | 2.33333            | AT1G04860                                |
| GSVIVG01021064001 | 11                      | 6                          | 5                      | 1.2                | AT4G13630                                |
| GSVIVG01021159001 | 15                      | 11                         | 4                      | 2.75               | AT2G29100                                |
| GSVIVG01021271001 | 11                      | 6                          | 5                      | 1.2                | AT1G29800                                |
| GSVIVG01021280001 | 10                      | 5                          | 4                      | 1.25               | AT1G29750                                |
| GSVIVG01021285001 | 18                      | 12                         | 5                      | 2.4                | AT1G07650                                |
| GSVIVG01021286001 | 11                      | 7                          | 4                      | 1.75               | AT1G07650                                |
| GSVIVG01021365001 | 18                      | 10                         | 8                      | 1.25               | AT1G10680                                |
| GSVIVG01021366001 | 23                      | 12                         | 11                     | 1.09091            | AT4G18050                                |
| GSVIVG01021379001 | 11                      | 8                          | 3                      | 2.66667            | AT1G29400                                |
| GSVIVG01021381001 | 14                      | 10                         | 4                      | 2.5                | AT4G18130                                |
| GSVIVG01021382001 | 10                      | 7                          | 3                      | 2.33333            | AT5G46410                                |
| GSVIVG01021383001 | 12                      | 8                          | 4                      | 2                  | AT5G46400                                |
| GSVIVG01021403001 | 11                      | 6                          | 5                      | 1.2                | AT3G14730                                |
| GSVIVG01021576001 | 11                      | 8                          | 3                      | 2.66667            | AT4G21070                                |
| GSVIVG01021602001 | 10                      | 7                          | 3                      | 2.33333            | AT3G18670                                |
| GSVIVG01021635001 | 11                      | 7                          | 4                      | 1.75               | AT3G47570                                |
| GSVIVG01021645001 | 28                      | 16                         | 12                     | 1.33333            | AT3G47570                                |
| GSVIVG01021648001 | 17                      | 14                         | 3                      | 4.66667            | AT5G20480                                |
| GSVIVG01021671001 | 13                      | 9                          | 4                      | 2.25               | AT1G21270                                |

*continued in next page*

| <b>Gene ID</b>    | <b>Number Exon SNPs</b> | <b>Non Synonymous SNPs</b> | <b>Synonymous SNPs</b> | <b>dN/dS ratio</b> | <b><i>Arabidopsis</i> best homologue</b> |
|-------------------|-------------------------|----------------------------|------------------------|--------------------|------------------------------------------|
| GSVIVG01021720001 | 10                      | 6                          | 4                      | 1.5                | AT2G34790                                |
| GSVIVG01021752001 | 11                      | 6                          | 5                      | 1.2                | AT1G30610                                |
| GSVIVG01021884001 | 10                      | 6                          | 4                      | 1.5                | AT1G08720                                |
| GSVIVG01022038001 | 28                      | 17                         | 11                     | 1.54545            | AT2G48060                                |
| GSVIVG01022139001 | 11                      | 7                          | 4                      | 1.75               | AT3G50370                                |
| GSVIVG01022350001 | 10                      | 7                          | 3                      | 2.33333            | AT2G10440                                |
| GSVIVG01022462001 | 11                      | 6                          | 5                      | 1.2                | AT3G03790                                |
| GSVIVG01022829001 | 15                      | 13                         | 1                      | 13                 | AT3G14470                                |
| GSVIVG01022835001 | 12                      | 9                          | 3                      | 3                  | AT3G14470                                |
| GSVIVG01022931001 | 16                      | 12                         | 4                      | 3                  | AT3G14470                                |
| GSVIVG01022963001 | 18                      | 10                         | 8                      | 1.25               | AT3G14470                                |
| GSVIVG01023011001 | 12                      | 10                         | 2                      | 5                  | AT3G14470                                |
| GSVIVG01023021001 | 29                      | 17                         | 12                     | 1.41667            | AT4G22970                                |
| GSVIVG01023025001 | 10                      | 8                          | 2                      | 4                  | AT5G17680                                |
| GSVIVG01023113001 | 16                      | 9                          | 6                      | 1.5                | AT5G49760                                |
| GSVIVG01023133001 | 10                      | 6                          | 4                      | 1.5                | AT5G49810                                |
| GSVIVG01023150001 | 12                      | 7                          | 5                      | 1.4                | AT1G10320                                |
| GSVIVG01023173001 | 11                      | 10                         | 1                      | 10                 | AT4G26090                                |
| GSVIVG01023191001 | 16                      | 12                         | 4                      | 3                  | AT4G27190                                |
| GSVIVG01023303001 | 10                      | 8                          | 2                      | 4                  | AT4G31940                                |
| GSVIVG01023631001 | 10                      | 6                          | 4                      | 1.5                | AT5G48930                                |
| GSVIVG01023816001 | 12                      | 8                          | 4                      | 2                  | AT4G39160                                |
| GSVIVG01023870001 | 13                      | 9                          | 4                      | 2.25               | AT4G35290                                |

*continued in next page*

| <b>Gene ID</b>    | <b>Number Exon SNPs</b> | <b>Non Synonymous SNPs</b> | <b>Synonymous SNPs</b> | <b>dN/dS ratio</b> | <b><i>Arabidopsis</i> best homologue</b> |
|-------------------|-------------------------|----------------------------|------------------------|--------------------|------------------------------------------|
| GSVIVG01023884001 | 13                      | 8                          | 5                      | 1.6                | AT4G38350                                |
| GSVIVG01023899001 | 11                      | 10                         | 1                      | 10                 | AT2G16750                                |
| GSVIVG01023932001 | 13                      | 7                          | 6                      | 1.16667            | AT2G17110                                |
| GSVIVG01023964001 | 15                      | 9                          | 6                      | 1.5                | AT5G40820                                |
| GSVIVG01024049001 | 10                      | 7                          | 2                      | 3.5                | AT4G38650                                |
| GSVIVG01024099001 | 10                      | 6                          | 4                      | 1.5                | AT1G50180                                |
| GSVIVG01024222001 | 11                      | 8                          | 3                      | 2.66667            | AT2G21440                                |
| GSVIVG01024252001 | 15                      | 10                         | 5                      | 2                  | AT2G01260                                |
| GSVIVG01024601001 | 11                      | 9                          | 2                      | 4.5                | AT1G06950                                |
| GSVIVG01024634001 | 14                      | 8                          | 6                      | 1.33333            | AT5G58450                                |
| GSVIVG01024715001 | 16                      | 9                          | 7                      | 1.28571            | AT5G58610                                |
| GSVIVG01024795001 | 10                      | 6                          | 4                      | 1.5                | AT2G38080                                |
| GSVIVG01024856001 | 17                      | 9                          | 8                      | 1.125              | AT3G46850                                |
| GSVIVG01025047001 | 12                      | 7                          | 5                      | 1.4                | AT1G07740                                |
| GSVIVG01025064001 | 11                      | 9                          | 2                      | 4.5                | AT5G59980                                |
| GSVIVG01025113001 | 11                      | 7                          | 4                      | 1.75               | AT5G60150                                |
| GSVIVG01025341001 | 31                      | 19                         | 11                     | 1.72727            | AT3G45140                                |
| GSVIVG01025342001 | 10                      | 8                          | 2                      | 4                  | AT3G45140                                |
| GSVIVG01025344001 | 27                      | 14                         | 13                     | 1.07692            | AT2G44480                                |
| GSVIVG01025346001 | 25                      | 16                         | 9                      | 1.77778            | AT5G60900                                |
| GSVIVG01025347001 | 10                      | 7                          | 3                      | 2.33333            | AT5G60900                                |
| GSVIVG01025349001 | 10                      | 8                          | 2                      | 4                  | AT5G60900                                |
| GSVIVG01025382001 | 12                      | 7                          | 4                      | 1.75               | AT4G10620                                |

*continued in next page*

| <b>Gene ID</b>    | <b>Number Exon SNPs</b> | <b>Non Synonymous SNPs</b> | <b>Synonymous SNPs</b> | <b>dN/dS ratio</b> | <b><i>Arabidopsis</i> best homologue</b> |
|-------------------|-------------------------|----------------------------|------------------------|--------------------|------------------------------------------|
| GSVIVG01025406001 | 12                      | 8                          | 4                      | 2                  | AT3G32940                                |
| GSVIVG01025430001 | 10                      | 6                          | 4                      | 1.5                | AT1G55320                                |
| GSVIVG01025465001 | 10                      | 6                          | 4                      | 1.5                | AT1G55325                                |
| GSVIVG01025477001 | 19                      | 11                         | 7                      | 1.57143            | AT4G04220                                |
| GSVIVG01025574001 | 18                      | 10                         | 8                      | 1.25               | AT2G37320                                |
| GSVIVG01025607001 | 10                      | 8                          | 2                      | 4                  | AT5G42450                                |
| GSVIVG01025610001 | 10                      | 8                          | 2                      | 4                  | AT2G37420                                |
| GSVIVG01025958001 | 13                      | 9                          | 4                      | 2.25               | AT4G12010                                |
| GSVIVG01026003001 | 11                      | 6                          | 5                      | 1.2                | AT5G17680                                |
| GSVIVG01026059001 | 22                      | 14                         | 8                      | 1.75               | AT1G22540                                |
| GSVIVG01026086001 | 11                      | 9                          | 2                      | 4.5                | AT3G28890                                |
| GSVIVG01026090001 | 11                      | 6                          | 5                      | 1.2                | AT1G22930                                |
| GSVIVG01026092001 | 13                      | 7                          | 5                      | 1.4                | AT3G14470                                |
| GSVIVG01026124001 | 11                      | 6                          | 5                      | 1.2                | AT1G69730                                |
| GSVIVG01026152001 | 14                      | 12                         | 2                      | 6                  | AT4G27190                                |
| GSVIVG01026162001 | 13                      | 9                          | 4                      | 2.25               | AT4G27190                                |
| GSVIVG01026196001 | 12                      | 7                          | 5                      | 1.4                | AT4G08850                                |
| GSVIVG01026264001 | 14                      | 9                          | 5                      | 1.8                | AT1G31280                                |
| GSVIVG01026283001 | 12                      | 10                         | 2                      | 5                  | AT5G06540                                |
| GSVIVG01026307001 | 10                      | 7                          | 3                      | 2.33333            | AT5G19820                                |
| GSVIVG01026352001 | 11                      | 8                          | 2                      | 4                  | AT4G16660                                |
| GSVIVG01026440001 | 10                      | 7                          | 3                      | 2.33333            | AT5G63870                                |
| GSVIVG01026446001 | 13                      | 7                          | 6                      | 1.16667            | AT5G65950                                |

*continued in next page*

| <b>Gene ID</b>    | <b>Number Exon SNPs</b> | <b>Non Synonymous SNPs</b> | <b>Synonymous SNPs</b> | <b>dN/dS ratio</b> | <b><i>Arabidopsis</i> best homologue</b> |
|-------------------|-------------------------|----------------------------|------------------------|--------------------|------------------------------------------|
| GSVIVG01026545001 | 13                      | 9                          | 4                      | 2.25               | AT3G18730                                |
| GSVIVG01026728001 | 13                      | 8                          | 5                      | 1.6                | AT5G35450                                |
| GSVIVG01026731001 | 17                      | 10                         | 7                      | 1.42857            |                                          |
| GSVIVG01026936001 | 15                      | 8                          | 7                      | 1.14286            | AT2G45910                                |
| GSVIVG01027028001 | 12                      | 9                          | 3                      | 3                  | AT2G46240                                |
| GSVIVG01027083001 | 12                      | 9                          | 2                      | 4.5                | AT3G61690                                |
| GSVIVG01027188001 | 14                      | 8                          | 6                      | 1.33333            | AT1G01220                                |
| GSVIVG01027368001 | 10                      | 6                          | 4                      | 1.5                | AT1G20160                                |
| GSVIVG01027401001 | 10                      | 8                          | 2                      | 4                  |                                          |
| GSVIVG01027475001 | 11                      | 9                          | 2                      | 4.5                | AT4G35580                                |
| GSVIVG01027551001 | 16                      | 10                         | 6                      | 1.66667            | AT2G45550                                |
| GSVIVG01027586001 | 10                      | 6                          | 4                      | 1.5                | AT1G01900                                |
| GSVIVG01027600001 | 11                      | 7                          | 4                      | 1.75               | AT2G45400                                |
| GSVIVG01027630001 | 10                      | 6                          | 4                      | 1.5                | AT2G45460                                |
| GSVIVG01027657001 | 21                      | 15                         | 6                      | 2.5                | AT3G60740                                |
| GSVIVG01027717001 | 10                      | 6                          | 4                      | 1.5                | AT4G24000                                |
| GSVIVG01027840001 | 12                      | 7                          | 5                      | 1.4                | AT5G43310                                |
| GSVIVG01027853001 | 12                      | 8                          | 4                      | 2                  | AT5G17930                                |
| GSVIVG01027951001 | 12                      | 7                          | 5                      | 1.4                | AT3G49142                                |
| GSVIVG01028203001 | 11                      | 6                          | 5                      | 1.2                | AT4G01860                                |
| GSVIVG01028273001 | 11                      | 8                          | 3                      | 2.66667            | AT1G02290                                |
| GSVIVG01028383001 | 10                      | 6                          | 4                      | 1.5                | AT5G07900                                |
| GSVIVG01028400001 | 19                      | 10                         | 9                      | 1.11111            | AT1G17230                                |

*continued in next page*



| <b>Gene ID</b>    | <b>Number Exon SNPs</b> | <b>Non Synonymous SNPs</b> | <b>Synonymous SNPs</b> | <b>dN/dS ratio</b> | <b><i>Arabidopsis</i> best homologue</b> |
|-------------------|-------------------------|----------------------------|------------------------|--------------------|------------------------------------------|
| GSVIVG01028401001 | 20                      | 11                         | 9                      | 1.22222            | AT4G08850                                |
| GSVIVG01028440001 | 13                      | 7                          | 6                      | 1.16667            | AT1G04120                                |
| GSVIVG01028489001 | 12                      | 7                          | 5                      | 1.4                | AT2G20210                                |
| GSVIVG01028612001 | 10                      | 8                          | 2                      | 4                  | ATMG00710                                |
| GSVIVG01028685001 | 11                      | 7                          | 4                      | 1.75               | AT3G24880                                |
| GSVIVG01028736001 | 11                      | 7                          | 4                      | 1.75               | AT1G65810                                |
| GSVIVG01028738001 | 10                      | 6                          | 4                      | 1.5                | AT1G65810                                |
| GSVIVG01028853001 | 12                      | 8                          | 4                      | 2                  | AT4G01290                                |
| GSVIVG01028873001 | 11                      | 7                          | 4                      | 1.75               | AT5G23980                                |
| GSVIVG01028875001 | 18                      | 11                         | 7                      | 1.57143            |                                          |
| GSVIVG01028977001 | 22                      | 15                         | 7                      | 2.14286            | AT5G52290                                |
| GSVIVG01028978001 | 13                      | 8                          | 5                      | 1.6                | AT1G63300                                |
| GSVIVG01028990001 | 19                      | 10                         | 8                      | 1.25               | AT1G04600                                |
| GSVIVG01029009001 | 11                      | 7                          | 4                      | 1.75               | AT5G17680                                |
| GSVIVG01029013001 | 12                      | 10                         | 2                      | 5                  | AT5G17680                                |
| GSVIVG01029042001 | 18                      | 11                         | 7                      | 1.57143            | AT1G04650                                |
| GSVIVG01029109001 | 12                      | 7                          | 4                      | 1.75               | AT4G15560                                |
| GSVIVG01029148001 | 13                      | 9                          | 4                      | 2.25               | AT3G47570                                |
| GSVIVG01029195001 | 10                      | 6                          | 4                      | 1.5                | AT2G24720                                |
| GSVIVG01029198001 | 14                      | 8                          | 6                      | 1.33333            | AT2G29120                                |
| GSVIVG01029278001 | 10                      | 8                          | 2                      | 4                  | AT5G20480                                |
| GSVIVG01029297001 | 11                      | 7                          | 4                      | 1.75               | AT4G27190                                |
| GSVIVG01029347001 | 12                      | 7                          | 5                      | 1.4                | AT4G33170                                |

*continued in next page*

| <b>Gene ID</b>    | <b>Number Exon SNPs</b> | <b>Non Synonymous SNPs</b> | <b>Synonymous SNPs</b> | <b>dN/dS ratio</b> | <b><i>Arabidopsis</i> best homologue</b> |
|-------------------|-------------------------|----------------------------|------------------------|--------------------|------------------------------------------|
| GSVIVG01029442001 | 11                      | 6                          | 5                      | 1.2                | AT1G79000                                |
| GSVIVG01029524001 | 11                      | 6                          | 5                      | 1.2                | AT2G07050                                |
| GSVIVG01029525001 | 10                      | 7                          | 3                      | 2.33333            | AT2G07050                                |
| GSVIVG01029713001 | 11                      | 8                          | 2                      | 4                  | AT4G26090                                |
| GSVIVG01029720001 | 17                      | 13                         | 4                      | 3.25               | AT1G56130                                |
| GSVIVG01029870001 | 11                      | 6                          | 5                      | 1.2                | AT5G01950                                |
| GSVIVG01029953001 | 12                      | 7                          | 5                      | 1.4                | AT5G35910                                |
| GSVIVG01030062001 | 16                      | 10                         | 6                      | 1.66667            | AT4G20140                                |
| GSVIVG01030338001 | 23                      | 16                         | 7                      | 2.28571            | AT4G13920                                |
| GSVIVG01030340001 | 27                      | 19                         | 8                      | 2.375              | AT2G15080                                |
| GSVIVG01030367001 | 13                      | 10                         | 3                      | 3.33333            | AT4G03500                                |
| GSVIVG01030468001 | 17                      | 10                         | 7                      | 1.42857            | AT2G32540                                |
| GSVIVG01030649001 | 14                      | 8                          | 6                      | 1.33333            | AT4G15180                                |
| GSVIVG01030782001 | 14                      | 9                          | 5                      | 1.8                | AT5G16630                                |
| GSVIVG01030888001 | 11                      | 6                          | 4                      | 1.5                | AT5G37930                                |
| GSVIVG01030939001 | 10                      | 7                          | 3                      | 2.33333            | AT1G15125                                |
| GSVIVG01031076001 | 11                      | 8                          | 3                      | 2.66667            | AT1G67230                                |
| GSVIVG01031124001 | 14                      | 9                          | 5                      | 1.8                | AT3G11710                                |
| GSVIVG01031214001 | 12                      | 8                          | 4                      | 2                  | AT5G26910                                |
| GSVIVG01031340001 | 15                      | 9                          | 6                      | 1.5                |                                          |
| GSVIVG01031380001 | 17                      | 11                         | 5                      | 2.2                | AT1G66950                                |
| GSVIVG01031382001 | 15                      | 12                         | 3                      | 4                  | AT3G22430                                |
| GSVIVG01031410001 | 10                      | 6                          | 4                      | 1.5                | AT5G22750                                |

*continued in next page*

| <b>Gene ID</b>    | <b>Number Exon SNPs</b> | <b>Non Synonymous SNPs</b> | <b>Synonymous SNPs</b> | <b>dN/dS ratio</b> | <b><i>Arabidopsis</i> best homologue</b> |
|-------------------|-------------------------|----------------------------|------------------------|--------------------|------------------------------------------|
| GSVIVG01031423001 | 10                      | 6                          | 4                      | 1.5                | AT5G22820                                |
| GSVIVG01031452001 | 11                      | 7                          | 4                      | 1.75               | AT2G27980                                |
| GSVIVG01031477001 | 10                      | 9                          | 1                      | 9                  | AT3G61220                                |
| GSVIVG01031569001 | 13                      | 7                          | 6                      | 1.16667            | AT4G14180                                |
| GSVIVG01031570001 | 14                      | 9                          | 5                      | 1.8                | AT4G14200                                |
| GSVIVG01031656001 | 12                      | 7                          | 5                      | 1.4                | AT1G48360                                |
| GSVIVG01031756001 | 18                      | 11                         | 7                      | 1.57143            | AT3G19210                                |
| GSVIVG01031766001 | 15                      | 8                          | 7                      | 1.14286            | AT1G49630                                |
| GSVIVG01031785001 | 10                      | 6                          | 4                      | 1.5                | AT2G15820                                |
| GSVIVG01031849001 | 11                      | 6                          | 5                      | 1.2                | AT3G57430                                |
| GSVIVG01031928001 | 10                      | 7                          | 3                      | 2.33333            | AT3G18840                                |
| GSVIVG01031991001 | 14                      | 9                          | 5                      | 1.8                | AT3G14470                                |
| GSVIVG01032029001 | 11                      | 8                          | 2                      | 4                  | AT3G45140                                |
| GSVIVG01032040001 | 12                      | 7                          | 5                      | 1.4                | AT5G44760                                |
| GSVIVG01032066001 | 11                      | 6                          | 4                      | 1.5                | AT3G12640                                |
| GSVIVG01032069001 | 12                      | 8                          | 4                      | 2                  | AT1G19485                                |
| GSVIVG01032086001 | 18                      | 12                         | 6                      | 2                  | AT5G16850                                |
| GSVIVG01032165001 | 12                      | 8                          | 4                      | 2                  | AT5G13690                                |
| GSVIVG01032201001 | 11                      | 6                          | 5                      | 1.2                | AT3G14470                                |
| GSVIVG01032204001 | 11                      | 9                          | 2                      | 4.5                | AT3G14470                                |
| GSVIVG01032210001 | 17                      | 12                         | 5                      | 2.4                | AT3G14470                                |
| GSVIVG01032250001 | 11                      | 8                          | 3                      | 2.66667            | AT4G16130                                |
| GSVIVG01032348001 | 11                      | 6                          | 5                      | 1.2                | AT3G01680                                |

*continued in next page*

| <b>Gene ID</b>    | <b>Number Exon SNPs</b> | <b>Non Synonymous SNPs</b> | <b>Synonymous SNPs</b> | <b>dN/dS ratio</b> | <b><i>Arabidopsis</i> best homologue</b> |
|-------------------|-------------------------|----------------------------|------------------------|--------------------|------------------------------------------|
| GSVIVG01032403001 | 14                      | 11                         | 3                      | 3.66667            | AT5G40480                                |
| GSVIVG01032410001 | 20                      | 12                         | 8                      | 1.5                |                                          |
| GSVIVG01032411001 | 34                      | 23                         | 11                     | 2.09091            | AT5G24090                                |
| GSVIVG01032435001 | 11                      | 7                          | 4                      | 1.75               | AT5G40380                                |
| GSVIVG01032492001 | 10                      | 7                          | 3                      | 2.33333            | AT3G01460                                |
| GSVIVG01032517001 | 10                      | 6                          | 4                      | 1.5                | AT3G01420                                |
| GSVIVG01032577001 | 11                      | 6                          | 4                      | 1.5                | AT3G28345                                |
| GSVIVG01032595001 | 17                      | 10                         | 6                      | 1.66667            | AT3G47910                                |
| GSVIVG01032611001 | 13                      | 7                          | 6                      | 1.16667            | AT4G08850                                |
| GSVIVG01032655001 | 11                      | 7                          | 4                      | 1.75               | AT5G05190                                |
| GSVIVG01032657001 | 13                      | 8                          | 5                      | 1.6                | AT2G40770                                |
| GSVIVG01032665001 | 17                      | 9                          | 8                      | 1.125              | AT2G40720                                |
| GSVIVG01032688001 | 13                      | 7                          | 6                      | 1.16667            | AT5G05260                                |
| GSVIVG01032828001 | 10                      | 8                          | 2                      | 4                  | AT1G50180                                |
| GSVIVG01032830001 | 10                      | 7                          | 3                      | 2.33333            | AT1G53350                                |
| GSVIVG01032850001 | 15                      | 10                         | 5                      | 2                  | AT5G20480                                |
| GSVIVG01032851001 | 11                      | 8                          | 3                      | 2.66667            | AT5G05730                                |
| GSVIVG01032879001 | 16                      | 10                         | 6                      | 1.66667            | AT3G51550                                |
| GSVIVG01032898001 | 17                      | 10                         | 7                      | 1.42857            | AT5G39040                                |
| GSVIVG01032944001 | 15                      | 9                          | 6                      | 1.5                | AT4G20060                                |
| GSVIVG01032991001 | 10                      | 7                          | 3                      | 2.33333            | AT5G18750                                |
| GSVIVG01033051001 | 16                      | 10                         | 6                      | 1.66667            | AT1G24300                                |
| GSVIVG01033116001 | 11                      | 7                          | 4                      | 1.75               | AT2G34930                                |

*continued in next page*

| <b>Gene ID</b>    | <b>Number Exon SNPs</b> | <b>Non Synonymous SNPs</b> | <b>Synonymous SNPs</b> | <b>dN/dS ratio</b> | <b><i>Arabidopsis</i> best homologue</b> |
|-------------------|-------------------------|----------------------------|------------------------|--------------------|------------------------------------------|
| GSVIVG01033121001 | 14                      | 8                          | 5                      | 1.6                | AT2G29120                                |
| GSVIVG01033179001 | 16                      | 10                         | 6                      | 1.66667            | AT4G31570                                |
| GSVIVG01033283001 | 12                      | 8                          | 4                      | 2                  | AT2G41790                                |
| GSVIVG01033565001 | 19                      | 16                         | 3                      | 5.33333            | AT5G04020                                |
| GSVIVG01033735001 | 15                      | 8                          | 7                      | 1.14286            | AT5G03800                                |
| GSVIVG01033783001 | 15                      | 8                          | 7                      | 1.14286            | AT2G36480                                |
| GSVIVG01033977001 | 12                      | 8                          | 4                      | 2                  | AT3G47110                                |
| GSVIVG01034063001 | 13                      | 7                          | 6                      | 1.16667            | AT5G02010                                |
| GSVIVG01034122001 | 11                      | 6                          | 4                      | 1.5                | AT3G47570                                |
| GSVIVG01034131001 | 10                      | 6                          | 4                      | 1.5                | AT5G02140                                |
| GSVIVG01034199001 | 10                      | 6                          | 4                      | 1.5                | AT2G28780                                |
| GSVIVG01034211001 | 13                      | 9                          | 4                      | 2.25               | AT3G53720                                |
| GSVIVG01034283001 | 14                      | 11                         | 3                      | 3.66667            | AT1G58190                                |
| GSVIVG01034359001 | 11                      | 6                          | 5                      | 1.2                | AT1G50380                                |
| GSVIVG01034429001 | 12                      | 11                         | 1                      | 11                 | AT5G66900                                |
| GSVIVG01034432001 | 10                      | 7                          | 3                      | 2.33333            | AT5G66900                                |
| GSVIVG01034473001 | 13                      | 7                          | 6                      | 1.16667            | AT1G35660                                |
| GSVIVG01034493001 | 18                      | 13                         | 4                      | 3.25               | AT1G34420                                |
| GSVIVG01034553001 | 10                      | 6                          | 4                      | 1.5                |                                          |
| GSVIVG01034601001 | 10                      | 7                          | 3                      | 2.33333            | AT3G10650                                |
| GSVIVG01034672001 | 10                      | 7                          | 3                      | 2.33333            | AT5G04500                                |
| GSVIVG01034713001 | 18                      | 11                         | 7                      | 1.57143            | AT5G04560                                |
| GSVIVG01034734001 | 10                      | 7                          | 3                      | 2.33333            | AT3G52240                                |

*continued in next page*

| <b>Gene ID</b>    | <b>Number Exon SNPs</b> | <b>Non Synonymous SNPs</b> | <b>Synonymous SNPs</b> | <b>dN/dS ratio</b> | <b><i>Arabidopsis</i> best homologue</b> |
|-------------------|-------------------------|----------------------------|------------------------|--------------------|------------------------------------------|
| GSVIVG01034745001 | 23                      | 16                         | 5                      | 3.2                | AT2G36380                                |
| GSVIVG01034746001 | 13                      | 9                          | 4                      | 2.25               | AT1G15520                                |
| GSVIVG01034748001 | 19                      | 14                         | 5                      | 2.8                | AT1G66950                                |
| GSVIVG01034779001 | 17                      | 10                         | 7                      | 1.42857            | AT1G35530                                |
| GSVIVG01034783001 | 10                      | 5                          | 4                      | 1.25               | AT5G09360                                |
| GSVIVG01034996001 | 20                      | 14                         | 5                      | 2.8                | AT5G58040                                |
| GSVIVG01035107001 | 15                      | 9                          | 6                      | 1.5                | AT3G06810                                |
| GSVIVG01035118001 | 15                      | 8                          | 7                      | 1.14286            | AT5G49150                                |
| GSVIVG01035134001 | 13                      | 10                         | 3                      | 3.33333            |                                          |
| GSVIVG01035145001 | 10                      | 6                          | 4                      | 1.5                | AT3G06880                                |
| GSVIVG01035304001 | 13                      | 9                          | 3                      | 3                  | AT5G25930                                |
| GSVIVG01035311001 | 10                      | 6                          | 3                      | 2                  | AT5G25930                                |
| GSVIVG01035313001 | 21                      | 15                         | 6                      | 2.5                | AT5G25930                                |
| GSVIVG01035448001 | 11                      | 6                          | 5                      | 1.2                | AT5G12080                                |
| GSVIVG01035456001 | 11                      | 7                          | 4                      | 1.75               | AT5G47430                                |
| GSVIVG01035630001 | 11                      | 6                          | 5                      | 1.2                | AT5G25820                                |
| GSVIVG01035633001 | 13                      | 8                          | 4                      | 2                  | AT3G63520                                |
| GSVIVG01035664001 | 10                      | 7                          | 3                      | 2.33333            | AT4G32730                                |
| GSVIVG01035871001 | 11                      | 9                          | 2                      | 4.5                | AT4G32190                                |
| GSVIVG01035925001 | 12                      | 8                          | 4                      | 2                  |                                          |
| GSVIVG01035940001 | 10                      | 6                          | 4                      | 1.5                | AT1G80490                                |
| GSVIVG01036010001 | 10                      | 6                          | 4                      | 1.5                | AT3G25970                                |
| GSVIVG01036130001 | 10                      | 6                          | 4                      | 1.5                | AT1G08350                                |

*continued in next page*

| <b>Gene ID</b>    | <b>Number Exon SNPs</b> | <b>Non Synonymous SNPs</b> | <b>Synonymous SNPs</b> | <b>dN/dS ratio</b> | <b><i>Arabidopsis</i> best homologue</b> |
|-------------------|-------------------------|----------------------------|------------------------|--------------------|------------------------------------------|
| GSVIVG01036167001 | 13                      | 8                          | 5                      | 1.6                | AT2G04160                                |
| GSVIVG01036186001 | 11                      | 8                          | 3                      | 2.66667            | AT4G13650                                |
| GSVIVG01036191001 | 16                      | 10                         | 5                      | 2                  | AT4G27220                                |
| GSVIVG01036255001 | 16                      | 9                          | 7                      | 1.28571            | AT1G12700                                |
| GSVIVG01036294001 | 17                      | 12                         | 4                      | 3                  | AT5G17680                                |
| GSVIVG01036304001 | 10                      | 7                          | 3                      | 2.33333            | AT5G36930                                |
| GSVIVG01036354001 | 11                      | 6                          | 5                      | 1.2                | AT5G36930                                |
| GSVIVG01036376001 | 10                      | 6                          | 3                      | 2                  | AT5G23960                                |
| GSVIVG01036377001 | 12                      | 10                         | 2                      | 5                  | AT1G31480                                |
| GSVIVG01036400001 | 12                      | 10                         | 2                      | 5                  | AT5G36930                                |
| GSVIVG01036435001 | 12                      | 7                          | 5                      | 1.4                | AT1G09620                                |
| GSVIVG01036511001 | 11                      | 6                          | 5                      | 1.2                | AT3G02330                                |
| GSVIVG01036582001 | 16                      | 9                          | 7                      | 1.28571            | AT3G14460                                |
| GSVIVG01036660001 | 10                      | 7                          | 3                      | 2.33333            | AT3G14470                                |
| GSVIVG01036788001 | 15                      | 8                          | 7                      | 1.14286            | AT1G16480                                |
| GSVIVG01036806001 | 10                      | 7                          | 3                      | 2.33333            | AT1G79150                                |
| GSVIVG01036908001 | 11                      | 6                          | 5                      | 1.2                | AT1G31650                                |
| GSVIVG01036966001 | 11                      | 6                          | 5                      | 1.2                | AT1G09970                                |
| GSVIVG01037112001 | 12                      | 8                          | 4                      | 2                  | AT1G21270                                |
| GSVIVG01037219001 | 24                      | 15                         | 9                      | 1.66667            | AT5G17680                                |
| GSVIVG01037229001 | 12                      | 7                          | 5                      | 1.4                | AT1G33590                                |
| GSVIVG01037231001 | 15                      | 11                         | 4                      | 2.75               | AT5G12400                                |
| GSVIVG01037278001 | 10                      | 8                          | 2                      | 4                  | AT5G19400                                |

*continued in next page*

| <b>Gene ID</b>    | <b>Number Exon SNPs</b> | <b>Non Synonymous SNPs</b> | <b>Synonymous SNPs</b> | <b>dN/dS ratio</b> | <b><i>Arabidopsis</i> best homologue</b> |
|-------------------|-------------------------|----------------------------|------------------------|--------------------|------------------------------------------|
| GSVIVG01037357001 | 10                      | 6                          | 4                      | 1.5                | AT5G22010                                |
| GSVIVG01037358001 | 29                      | 19                         | 9                      | 2.11111            | AT2G26780                                |
| GSVIVG01037631001 | 14                      | 10                         | 4                      | 2.5                | AT4G26090                                |
| GSVIVG01037804001 | 12                      | 8                          | 4                      | 2                  | AT3G22080                                |
| GSVIVG01037844001 | 10                      | 8                          | 2                      | 4                  | AT3G19620                                |
| GSVIVG01037894001 | 14                      | 9                          | 5                      | 1.8                | AT3G19510                                |
| GSVIVG01037956001 | 12                      | 9                          | 3                      | 3                  | AT1G30810                                |
| GSVIVG01038343001 | 10                      | 7                          | 3                      | 2.33333            | AT4G21390                                |
| GSVIVG01038391001 | 13                      | 10                         | 3                      | 3.33333            | AT1G61300                                |
| GSVIVG01038404001 | 11                      | 9                          | 2                      | 4.5                | AT5G63020                                |
| GSVIVG01038588001 | 13                      | 7                          | 6                      | 1.16667            | AT5G24320                                |
| GSVIVG01038603001 | 30                      | 18                         | 12                     | 1.5                | AT5G24350                                |
| GSVIVG01038628001 | 11                      | 6                          | 5                      | 1.2                | AT1G73080                                |
| GSVIVG01038660001 | 19                      | 12                         | 7                      | 1.71429            | AT3G49490                                |
| GSVIVG01038687001 | 14                      | 8                          | 6                      | 1.33333            | AT1G10680                                |
| GSVIVG01038699001 | 10                      | 6                          | 4                      | 1.5                | AT3G47580                                |
| GSVIVG01038709001 | 15                      | 8                          | 7                      | 1.14286            | AT5G53440                                |
| GSVIVG01038755001 | 12                      | 10                         | 1                      | 10                 | AT1G27170                                |
