# Supplementary material for: Whole genome comparison between table and wine grapes reveals a comprehensive catalog of structural variants
Source: PubMed Central journal article supplement (PMC3890619; doi:10.1186/1471-2229-14-7), 2014-01-07
Supplement: 1471-2229-14-7-S7.pdf [file 1471-2229-14-7-S7.pdf]

**Supplementary Table 5** – GO enrichment on rapidly evolving genes. GO term and annotation of genes with more than 10 SNPs and dN/dS ratio (nonsynonymous-to-synonymous substitutions) higher than 1 in ‘Sultanina’ genome. Query Item refers to the number of genes classified in each GO term. Query Total refers to the number of rapidly evolving genes genes that presented a GO term associated. Although 520 genes were identified as rapidly evolving genes, only 410 presented a GO term associated.

| <b>GO Number</b> | <b>GO Description</b>            | <b>Query Item</b> | <b>Query Total</b> | <b>p-value</b> | <b>FDR</b> |
|------------------|----------------------------------|-------------------|--------------------|----------------|------------|
| GO:0006464       | protein modification process     | 102               | 410                | 1.1e-14        | 3.9e-12    |
| GO:0043412       | macromolecule modification       | 106               | 410                | 1.4e-12        | 2.6e-10    |
| GO:0051704       | multi-organism process           | 64                | 410                | 5e-10          | 6.1e-08    |
| GO:0022414       | reproductive process             | 68                | 410                | 3.1e-08        | 1.9e-06    |
| GO:0000003       | reproduction                     | 69                | 410                | 3.2e-08        | 1.9e-06    |
| GO:0032501       | multicellular organismal process | 106               | 410                | 3e-08          | 1.9e-06    |
| GO:0006950       | response to stress               | 108               | 410                | 8e-08          | 4.1e-06    |
| GO:0009607       | response to biotic stimulus      | 55                | 410                | 2e-07          | 9.1e-06    |
| GO:0007049       | cell cycle                       | 35                | 410                | 2.3e-07        | 9.4e-06    |
| GO:0050896       | response to stimulus             | 148               | 410                | 3.5e-07        | 1.3e-05    |

*continued in next page*

| <b>GO Number</b> | <b>GO Description</b>                     | <b>Query Item</b> | <b>Query Total</b> | <b>p-value</b> | <b>FDR</b> |
|------------------|-------------------------------------------|-------------------|--------------------|----------------|------------|
| GO:0016265       | death                                     | 24                | 410                | 6.2e-07        | 1.9e-05    |
| GO:0008219       | cell death                                | 24                | 410                | 6.2e-07        | 1.9e-05    |
| GO:0009791       | post-embryonic development                | 63                | 410                | 7.5e-07        | 2.1e-05    |
| GO:0003006       | reproductive developmental process        | 59                | 410                | 1.4e-06        | 3.5e-05    |
| GO:0048608       | reproductive structure development        | 52                | 410                | 1.5e-06        | 3.6e-05    |
| GO:0007275       | multicellular organismal development      | 95                | 410                | 1.9e-06        | 4.3e-05    |
| GO:0009790       | embryonic development                     | 26                | 410                | 3.5e-06        | 7e-05      |
| GO:0019538       | protein metabolic process                 | 123               | 410                | 3.4e-06        | 7e-05      |
| GO:0032502       | developmental process                     | 98                | 410                | 4e-06          | 7.6e-05    |
| GO:0048856       | anatomical structure development          | 84                | 410                | 5e-06          | 9.1e-05    |
| GO:0044267       | cellular protein metabolic process        | 113               | 410                | 6e-06          | 0.0001     |
| GO:0040029       | regulation of gene expression, epigenetic | 22                | 410                | 7.5e-06        | 0.00012    |
| GO:0065007       | biological regulation                     | 136               | 410                | 1.8e-05        | 0.00028    |
| GO:0006259       | DNA metabolic process                     | 28                | 410                | 2.8e-05        | 0.00042    |
| GO:0009875       | pollen-pistil interaction                 | 6                 | 410                | 4.2e-05        | 0.00061    |
| GO:0042592       | homeostatic process                       | 19                | 410                | 0.00011        | 0.0015     |

*continued in next page*

| <b>GO Number</b> | <b>GO Description</b>                    | <b>Query Item</b> | <b>Query Total</b> | <b>p-value</b> | <b>FDR</b> |
|------------------|------------------------------------------|-------------------|--------------------|----------------|------------|
| GO:0009605       | response to external stimulus            | 33                | 410                | 0.00011        | 0.0015     |
| GO:0051179       | localization                             | 86                | 410                | 0.00019        | 0.0024     |
| GO:0009987       | cellular process                         | 275               | 410                | 0.0002         | 0.0025     |
| GO:0065008       | regulation of biological quality         | 43                | 410                | 0.00023        | 0.0028     |
| GO:0007165       | signal transduction                      | 43                | 410                | 0.00042        | 0.0049     |
| GO:0050794       | regulation of cellular process           | 97                | 410                | 0.0005         | 0.0057     |
| GO:0050789       | regulation of biological process         | 108               | 410                | 0.00058        | 0.0064     |
| GO:0016043       | cellular component organization          | 70                | 410                | 0.00064        | 0.0068     |
| GO:0006810       | transport                                | 78                | 410                | 0.00075        | 0.0078     |
| GO:0051234       | establishment of localization            | 79                | 410                | 0.00087        | 0.0085     |
| GO:0043170       | macromolecule metabolic process          | 178               | 410                | 0.00087        | 0.0085     |
| GO:0009628       | response to abiotic stimulus             | 59                | 410                | 0.00093        | 0.0088     |
| GO:0044260       | cellular macromolecule metabolic process | 167               | 410                | 0.0011         | 0.0098     |
| GO:0044238       | primary metabolic process                | 216               | 410                | 0.0022         | 0.02       |
| GO:0044237       | cellular metabolic process               | 211               | 410                | 0.0029         | 0.026      |
| GO:0000166       | nucleotide binding                       | 131               | 410                | 1.5e-18        | 1.4e-16    |

*continued in next page*

| <b>GO Number</b> | <b>GO Description</b>                                                              | <b>Query Item</b> | <b>Query Total</b> | <b>p-value</b> | <b>FDR</b> |
|------------------|------------------------------------------------------------------------------------|-------------------|--------------------|----------------|------------|
| GO:0016772       | transferase activity, transferring phosphorus-containing groups                    | 67                | 410                | 3.6e-13        | 1.6e-11    |
| GO:0016301       | kinase activity                                                                    | 60                | 410                | 6.8e-13        | 2e-11      |
| GO:0016817       | hydrolase activity, acting on acid anhydrides                                      | 36                | 410                | 1.1e-07        | 2.5e-06    |
| GO:0016818       | hydrolase activity, acting on acid anhydrides, in phosphorus-containing anhydrides | 35                | 410                | 2.1e-07        | 3.2e-06    |
| GO:0017111       | nucleoside-triphosphatase activity                                                 | 34                | 410                | 2e-07          | 3.2e-06    |
| GO:0004872       | receptor activity                                                                  | 11                | 410                | 2.8e-07        | 3.7e-06    |
| GO:0016740       | transferase activity                                                               | 82                | 410                | 4.7e-07        | 4.8e-06    |
| GO:0016462       | pyrophosphatase activity                                                           | 34                | 410                | 4.3e-07        | 4.8e-06    |
| GO:0003824       | catalytic activity                                                                 | 192               | 410                | 1.8e-06        | 1.7e-05    |
| GO:0005488       | binding                                                                            | 238               | 410                | 2.1e-06        | 1.7e-05    |
| GO:0060089       | molecular transducer activity                                                      | 16                | 410                | 7.3e-06        | 5.1e-05    |
| GO:0004871       | signal transducer activity                                                         | 16                | 410                | 7.3e-06        | 5.1e-05    |
| GO:0016787       | hydrolase activity                                                                 | 69                | 410                | 0.00088        | 0.0057     |
| GO:0030246       | carbohydrate binding                                                               | 9                 | 410                | 0.0021         | 0.013      |
| GO:0005515       | protein binding                                                                    | 56                | 410                | 0.0049         | 0.028      |

*continued in next page*

| <b>GO<br/>Number</b> | <b>GO<br/>Description</b> | <b>Query<br/>Item</b> | <b>Query<br/>Total</b> | <b>p-value</b> | <b>FDR</b> |
|----------------------|---------------------------|-----------------------|------------------------|----------------|------------|
| GO:0005886           | plasma membrane           | 111                   | 410                    | 1.5e-10        | 1.9e-08    |
| GO:0016020           | membrane                  | 148                   | 410                    | 1.1e-07        | 7.1e-06    |
