# Supplementary material for: Whole genome comparison between table and wine grapes reveals a comprehensive catalog of structural variants
Source: PubMed Central journal article supplement (PMC3890619; doi:10.1186/1471-2229-14-7), 2014-01-07
Supplement: 1471-2229-14-7-S9.pdf [file 1471-2229-14-7-S9.pdf]

**Supplementary Table 7** – Primers sequences of 50 selected INDELs and SNPs experimentally validated, discovered in the comparison of ‘Sultanina’ genes against the PN40024 reference genome. TSSNP refers to SNPs detected in ‘Sultanina’ genome, while SV\_SHORT or SV\_LONG refer respectively to short and long INDELs identified in the ‘Sultanina’ genome.

| SNP or SV ID  | Sequence forward 5'→3' | Tm (°C) | Sequence reverse 5'→3' | Tm (°C) |
|---------------|------------------------|---------|------------------------|---------|
| TSSNP336777   | ACAGGAGCTAATGGAACTGAG  | 57      | CCCCCTCTCATCTTACGCTT   | 59      |
| TSSNP425959   | ATGATGGAGAGAGAGAGAGAGA | 57      | TAACAGCATTGTCCTCCCA    | 59      |
| TSSNP337800   | GCAGTAAGTTATGAGGCACC   | 56      | GGGTTTCCACGTTGAGAAGA   | 58      |
| TSSNP338223   | GGGCTTTTGTGTACCCTCA    | 58      | CCTGTA CTCTCTTTTCCAC   | 56      |
| TSSNP337760   | GCTCAATCTGGGATTCAGGA   | 60      | TGGA AACTGGAGCAAACACA  | 60      |
| TSSNP296817   | TAGAACGGAATCCGCAAATC   | 60      | GGGAAATCCACCGTTATGA    | 60      |
| TSSNP338124   | CCTGGCTAAAGAAACAACCA   | 58      | TGCCACGTAATAAACGCAGA   | 60      |
| TSSNP429192   | GCAAGAAAAGCATGAGACCA   | 59      | TCAAACATCCAACAGCAAGC   | 60      |
| TSSNP429891   | ACCTGCTTACTCTCTCCACT   | 58      | GGAAGAAAACATCATCAAGGGT | 57      |
| TSSNP435167   | TGGGGGCAAACTAAGAAAA    | 60      | TAGGCAAGGCAAGAAATGGT   | 60      |
| TSSNP445004   | CCTCTGATAAAGGCAAAACCA  | 56      | TAGACAGTTGTATGCTCTGC   | 57      |
| TSSNP721904   | TTCATACCCACCAAATTCAGG  | 60      | AAAAGGAAATCACCTGGAGGA  | 60      |
| TSSNP1114022  | CTCTGGTCAGGCTTCTCAG    | 60      | CCTGAATTTGAGGAGCAGGT   | 59      |
| TSSNP435359   | GGTCCTTACAAGCCCACTCA   | 60      | TGCCAAAATCCGTCCTAAA    | 59      |
| TSSNP1027638  | CAGCGAAAGTGTGACGAAAC   | 59      | TTGAAAATGCGTTGAGGACT   | 58      |
| TSSNP1101736  | GTA AACGGATGCCCTTCAA   | 60      | CCGGTTGGGTTTCGATTAT    | 61      |
| TSSNP1103264  | TTCTCGGACTTCTCTTCCA    | 60      | GCTGGATGCAGAGCCACTAT   | 60      |
| TSSNP1037434  | TGAACAAGGGATAGGAATGAGA | 59      | CAGAAGTTGGTTACGCTGGC   | 59      |
| TSSNP820904   | AAACGCAGATGACGACAACC   | 59      | CTGGATGCTGGAGGACCTTG   | 60      |
| TSSNP820907   | CTTTGGCTTTGAGCAACCC    | 60      | TCAAGATGTGTGGAGGTGCAA  | 60      |
| TSSNP11061    | GCCCCACAACACGGACCATCG  | 60      | GCAGCAATAGGACGGAGCACA  | 57      |
| TSSNP11062    | GGAAGGCAAGGAAGCTGCCCC  | 60      | CACGGATGCGCACTTTGCGT   | 59      |
| TSSNP57956    | CACGGGTGCAAGTCCATGCT   | 58      | ACCCAGCTGCAGTGCTTTATCC | 59      |
| SV_LONG_23043 | TGCCGAGAGACTTGAAAGGT   | 60      | GGTGTGCTTTTGCTTCTGTG   | 60      |

*continued in next page*

| SNP or SV ID    | Sequence forward 5'→3' | Tm (°C) | Sequence reverse 5'→3' | Tm (°C) |
|-----------------|------------------------|---------|------------------------|---------|
| SV_SHORT_101491 | GAGATTGGTAGGGTGGCAAA   | 60      | AGCTGGCTGCTTTTCCTTCT   | 60      |
| SV_SHORT_119678 | TTTTTGCGCTTCATCATCAG   | 60      | TTGAAGGACAGCACTCATGC   | 60      |
| SV_SHORT_120106 | TGCTGTCAGAGATGGATTGC   | 60      | AAAAATGGGTATCCCCAAA    | 60      |
| SV_SHORT_120449 | TGGAATGGAAGTGAATCCAA   | 59      | TGCCTCAGCTCTGTCTCAA    | 60      |
| SV_SHORT_184121 | GTGGCCTCCACAGCTACTTC   | 60      | TCAGCAGTTGAGGTGCATTC   | 60      |
| SV_SHORT_196760 | TAAAGCCTTGGCTCATCAGG   | 60      | ACGCTAGGCTATTGGCTGAA   | 60      |
| SV_SHORT_230262 | AAAAGGATCAGGGCACTCCT   | 60      | AACCCCTTCTCATCCACTT    | 60      |
| SV_SHORT_348842 | AGTGGGAGGTGTTGGTGAAG   | 60      | CCACTACCACTCCCTCCAA    | 60      |
| SV_SHORT_362261 | AAACCAGGTGGTCCAGGAG    | 60      | TTGCGTTAATTTGTGCGAAG   | 60      |
| SV_SHORT_367940 | CACCCCATTTCTGTCTGATT   | 60      | GAGGGTGGCACTTTATGGAA   | 60      |
| SV_SHORT_370762 | TATGCAGGTGAGGAGCAACA   | 60      | CACCTGAGAGTTCACCACGA   | 60      |
| SV_SHORT_373848 | CCACTTCAACTTCCCTGTGG   | 61      | CAAGGTCTCAACCGAGTGGT   | 60      |
| SV_SHORT_392069 | TTCCAGTTTACGTCACCAA    | 60      | GTCTCCACCTGAACCTTGA    | 60      |
| SV_SHORT_392074 | TCAAGGTTCAAGTGGAGGAC   | 60      | AAACCCAAACAAAGCCTCCT   | 60      |
| SV_SHORT_450720 | GAGCGAGAGAGACCTCCAGA   | 60      | TTCAAGAGGGAGGGTCAATG   | 60      |
| SV_SHORT_453089 | GGCGACCTAGTGAGAATGGA   | 60      | GCTCTCTCCCATGCTTTCAC   | 60      |
| SV_SHORT_517122 | CACGCATTCATCATGGTCTC   | 60      | GTTGCTTACGTACGGCCATT   | 60      |
| SV_SHORT_538572 | CCAAAGCCAATGGACAAGAT   | 60      | AAATGCAGGATTTGGGTGTC   | 60      |
| SV_SHORT_541418 | CTTCATCCCATGAAACAGC    | 60      | ATCCATGCCTTGTGAGGTTC   | 60      |
| SV_SHORT_562799 | GCCTAACGGCAGATCAAGTC   | 60      | CCTCAAGCAAAAACCCAAAA   | 61      |
| SV_SHORT_5663   | TTGACGCAATTACCCTCCTC   | 60      | TTCCAATCAATGCGTGTGTT   | 60      |
| SV_SHORT_5760   | ATGTGAAGGTGGAGGAGGTG   | 60      | ACATAGCCGAAATCCAAACG   | 60      |
| SV_SHORT_81780  | TAAACTCCTACCCCGATCC    | 60      | TGATTCCCACCAGCTTGTCT   | 59      |
| SV_SHORT_89482  | TGCATCCACAAGAGTTCCAG   | 60      | AGCTTGCCCCTAATGGAGTT   | 60      |
| SV_SHORT_89496  | ATGCAGGCTCTTCGGATAACA  | 61      | ATGAAAATGGAGAGGCATGG   | 60      |
| SV_SHORT_89956  | GATGGACTTTGTTGGGCTTG   | 60      | AGTGGAAGTTCACCGACACC   | 60      |
