# Supplementary material for: Whole genome comparison between table and wine grapes reveals a comprehensive catalog of structural variants
Source: PubMed Central journal article supplement (PMC3890619; doi:10.1186/1471-2229-14-7), 2014-01-07
Supplement: 1471-2229-14-7-S10.pdf [file 1471-2229-14-7-S10.pdf]

**Supplementary Table 8** – Experimental validation of 24 INDELs and 21 SNPs identified in ‘Sultanina’ genes versus the reference genome PN40024. In the case of INDELs (SV-SHORT/LONG), allele profile was confirmed according with the size of alleles present in each locus, measured through capillary electrophoresis-laser-induced fluorescence assay. In the case of SNPs (TSSNP), allelic profiles were confirmed by sequencing and qPCR-HRM.

| SV ID           | Chromosome | Position | Reference Genome | Change observed in ‘Sultanina’ genome | Effect on ‘Sultanina’ genome      | Aminoacid change | Expected amplicon size ‘Sultanina’ – PN40024 |
|-----------------|------------|----------|------------------|---------------------------------------|-----------------------------------|------------------|----------------------------------------------|
| SV_SHORT.89956  | 17         | 7785109  | ACACATGCTTC      | A                                     | Deletion                          | *                | 282/282 – 293                                |
| SV_SHORT.89496  | 17         | 7106837  | GAGTGATGAATCA    | G                                     | Codon.deletion                    | GVMNQ/G          | 266/277 – 298                                |
| SV_SHORT.89482  | 17         | 7095256  | ATTAC            | A                                     | Frame.shift                       | -/-              | 246/249 – 250                                |
| SV_SHORT.81780  | 17         | 925625   | A                | ACGACTCGACTC                          | Insertion                         | *                | 417/417 – 380                                |
| SV_SHORT.120449 | 16         | 15813759 | C                | CCAAATACCCAAA                         | Codon.change.plus.codon.insertion | W/FWVFG          | 359/359 – 328                                |
| SV_SHORT.120106 | 16         | 15623087 | T                | TCAG                                  | Codon.insertion                   | -/L              | 355/355 – 344                                |
| SV_SHORT.453089 | 1          | 5706550  | CCTTCTGAG        | C                                     | Deletion                          | *                | 196/196 – 209                                |
| SV_SHORT.450720 | 1          | 3728596  | AGCG             | A                                     | Codon.change.plus.codon.deletion  | SD/N             | 346/346 – 339                                |
| SV_SHORT.196760 | 19         | 2195943  | CAT              | C                                     | Frame.shift                       | -/-              | 183/183 – 185                                |
| SV_SHORT.5663   | 13         | 4000057  | G                | GGA                                   | Frame.shift                       | -/?              | 285/289 – 290                                |
| SV_SHORT.362261 | 5          | 3607924  | GCTGGGCCAC       | G                                     | Codon.deletion                    | GWAT/G           | 265/274 – 279                                |
| SV_SHORT.119678 | 16         | 14991989 | C                | CTCCTCCTCCTCCAGGTGC                   | Codon.change.plus.codon.insertion | G/GDLEEEEE       | 391/404 – 368                                |
| SV_SHORT.541418 | 10         | 1943381  | T                | TGA                                   | Frame.shift                       | -/?              | 273/280 – 273                                |
| SV_SHORT.101491 | 16         | 401040   | GTTTGTTTT        | G                                     | Deletion                          | *                | 381/393 – 363                                |
| SV_SHORT.367940 | 5          | 7034140  | CTGTAAG          | C                                     | Codon.deletion                    | SVS/S            | 337/345 – 338                                |
| SV_SHORT.370762 | 5          | 8699248  | GTCT             | G                                     | Codon.change.plus.codon.deletion  | ED/D             | 229/241 – 235                                |
| SV_SHORT.517122 | 8          | 9635507  | T                | TTAATGATAAAGG                         | Insertion                         | *                | 313/327 – 308                                |
| SV_SHORT.562799 | 10         | 16875898 | A                | AAGAGGAAAACAAG                        | Insertion                         | *                | 249/249 – 239                                |
| SV_SHORT.392069 | 4          | 1227080  | C                | CCGCCAGCGTCTAGGAGTCTTT                | Stop.gained                       | -/KDS*TLA        | 293/293 – 282                                |
| SV_SHORT.392074 | 4          | 1228143  | C                | CCCA                                  | Codon.insertion                   | -/W              | 343/343 – 340                                |
| SV_SHORT.348842 | 6          | 16555163 | C                | CCTT                                  | Codon.insertion                   | P/PS             | 316/316 – 314                                |
| SV_SHORT.184121 | 14         | 23255574 | G                | GAGAGGAGGGAGTTGTGGC                   | Codon.change.plus.codon.insertion | L/RHNSLLF        | 390/390 – 366                                |
| SV_SHORT.538572 | 16_random  | 718827   | AT               | A                                     | Frame.shift                       | -/-              | 273/283 – 276                                |
| SV_SHORT.230262 | 18         | 5011593  | T                | TGCC                                  | Insertion                         | *                | 103/103 – 106                                |

| SNP ID       | Chromosome | Position | Reference Genome | Change observed in 'Sultanina' genome | Effect on 'Sultanina' genome | Aminoacid change | 'Sultanina' allele confirmed by HRM and sequencing |
|--------------|------------|----------|------------------|---------------------------------------|------------------------------|------------------|----------------------------------------------------|
| TSSNP336777  | 15         | 13799657 | A                | T                                     | Non_synonymous_coding        | M/L              | AT                                                 |
| TSSNP337800  | 15         | 14397062 | A                | G                                     | *                            | *                | AG                                                 |
| TSSNP338223  | 15         | 14551166 | A                | G                                     | *                            | *                | AG                                                 |
| TSSNP337760  | 15         | 14385143 | C                | T                                     | *                            | *                | CT                                                 |
| TSSNP296817  | 14         | 26840782 | G                | T                                     | *                            | *                | GT                                                 |
| TSSNP338124  | 15         | 14506869 | T                | A                                     | *                            | *                | TA                                                 |
| TSSNP429192  | 17         | 9607451  | C                | G                                     | Non_synonymous_coding        | Q/H              | CG                                                 |
| TSSNP429891  | 17         | 9863613  | A                | C                                     | Non_synonymous_coding        | S/A              | AC                                                 |
| TSSNP435167  | 17         | 11675001 | G                | A                                     | *                            | *                | GA                                                 |
| TSSNP445004  | 17         | 15635337 | C                | A                                     | *                            | *                | CA                                                 |
| TSSNP721904  | 3          | 5966208  | G                | A                                     | Non_synonymous_coding        | A/T              | GA                                                 |
| TSSNP1114022 | 9          | 22988877 | C                | G                                     | Non_synonymous_coding        | Q/H              | CG                                                 |
| TSSNP1027638 | 8          | 11490922 | G                | T                                     | *                            | *                | GT                                                 |
| TSSNP1101736 | 9          | 18038055 | C                | T                                     | *                            | *                | CT                                                 |
| TSSNP1103264 | 9          | 18489115 | T                | C                                     | Non_synonymous_coding        | H/R              | TC                                                 |
| TSSNP11061   | 10         | 3793348  | A                | G                                     | Non_synonymous_coding        | F/L              | AG                                                 |
| TSSNP11062   | 10         | 3793544  | T                | C                                     | Synonymous_coding            | R/R              | TC                                                 |
| TSSNP57956   | 11         | 1704505  | C                | A                                     | Non_synonymous_coding        | A/S              | AA                                                 |
| TSSNP1037434 | 8          | 14807290 | C                | G                                     | *                            | *                | CG                                                 |
| TSSNP820904  | 5          | 1463433  | T                | C                                     | *                            | *                | TC                                                 |
| TSSNP820907  | 5          | 1464222  | T                | C                                     | Non_synonymous_coding        | T/A              | TC                                                 |

\* SV or SNP located in upstream or intronic region, aminoacidic change not estimated.
