# Supplementary material for: Whole genome comparison between table and wine grapes reveals a comprehensive catalog of structural variants
Source: PubMed Central journal article supplement (PMC3890619; doi:10.1186/1471-2229-14-7), 2014-01-07
Supplement: 1471-2229-14-7-S11.pdf [file 1471-2229-14-7-S11.pdf]

**Supplementary Table 9** – Selected group of table grape varieties plus one used for wine production (‘Tokay’), representing different genetic backgrounds. Information on berry size, seed presence and skin color is included. ‘Origin’ corresponds to the original region or country where the variety was first described or where it was released.

| Variety           | Origin   | Berry characteristics             |
|-------------------|----------|-----------------------------------|
| Alba Rosa         | Chile    | Mid-size, seeded, red             |
| Autumm Royal      | USA      | Large, seedless, black            |
| Beauty Seedless   | USA      | Small, seedless, black            |
| Big Red           | USA      | Large, seedless, red              |
| Black Seedless    | Unknown  | Small, seedless, black            |
| Blush Seedless    | USA      | Mid-size, seedless, red           |
| Christmas Rose    | USA      | Mid-size, seedless, red           |
| Crimson Seedless  | USA      | Mid-size, seedless, red           |
| Dawn Seedless     | USA      | Large, white, seedless            |
| Emperor           | Unknown  | Large, seeded, red                |
| Flame Seedless    | USA      | Mid-size, seedless, red           |
| Ilusión           | Chile    | Mid-size, partially seeded, white |
| Italia Pirovano   | Italia   | Large, seeded, white              |
| Melissa           | USA      | Mid-size, seedless, white         |
| Moscatel Rosada   | Italy    | Mid-size, seeded, red             |
| Perlette          | USA      | Small, seedless, white            |
| Red Globe         | USA      | Large, seeded, red                |
| Red Seddless      | USA      | Large, seedless, red              |
| Ribier            | Francia  | Large, seeded, black              |
| Ruby Seedless     | USA      | Mid-size, seedless, red           |
| Superior Seedless | USA      | Mid-size, seedless, white         |
| Sultanina         | Mid East | Small, seedless, white            |

*continued in next page*

| <b>Variety</b> | <b>Origin</b> | <b>Berry characteristics</b> |
|----------------|---------------|------------------------------|
| Tokay          | Hungary       | Large, seeded, white         |
