# Supplementary material for: Whole genome comparison between table and wine grapes reveals a comprehensive catalog of structural variants
Source: PubMed Central journal article supplement (PMC3890619; doi:10.1186/1471-2229-14-7), 2014-01-07
Supplement: 1471-2229-14-7-S12.pdf [file 1471-2229-14-7-S12.pdf]

**Supplementary Table 6** – ‘Sultanina’ orthologous genes of *Arabidopsis thaliana* embryo development related genes containing SVs in promoter and coding regions. It was considered as functional, SV INDELs in promoter and coding regions as well as non synonymous and frame shift SNPs in the coding region. Genes located in QTLs for seedlessness previously mapped in a F1 population of 139 segregants generated by a cross between two seedless varieties ‘Ruby seedless’ and ‘Sultanina’ are indicated.

| Chr  | Transcript ID     | Annotation                                                      | Ortholog<br><i>Arabidopsis</i> | Promoter | CDS | Hom/Het | QTL Related |
|------|-------------------|-----------------------------------------------------------------|--------------------------------|----------|-----|---------|-------------|
| chr8 | GSVIVT01022436001 | ATPase family associated with various cellular activities (AAA) | AT5G27740                      | yes      | no  | hom     | yes         |
| chr8 | GSVIVT01022505001 | Peptidase M28 family protein                                    | AT3G54720                      | yes      | yes | het     | yes         |
| chr8 | GSVIVT01025749001 | Auxin efflux carrier family protein                             | AT1G73590                      | yes      | yes | hom     | yes         |
| chr8 | GSVIVT01033735001 | Pentatricopeptide repeat (PPR) superfamily protein              | AT5G03800                      | yes      | yes | het     | yes         |
| chr8 | GSVIVT01033767001 | Nucleotide-diphospho-sugar transferases superfamily protein     | AT5G03760                      | yes      | yes | hom     | yes         |

*continued in next page*

| Chr   | Transcript ID     | Annotation                                                    | Ortholog<br><i>Arabidopsis</i> | Promoter | CDS | Hom/Het | QTL Related |
|-------|-------------------|---------------------------------------------------------------|--------------------------------|----------|-----|---------|-------------|
| chr8  | GSVIVT01033776001 | Ergosterol biosynthesis ERG4/ERG24 family                     | AT3G52940                      | yes      | yes | hom     | yes         |
| chr8  | GSVIVT01033839001 | Transducin/WD40 repeat-like superfamily protein               | AT2G26060                      | yes      | yes | het     | yes         |
| chr8  | GSVIVT01033847001 | Aldolase-type TIM barrel family protein                       | AT2G36230                      | yes      | yes | hom     | yes         |
| chr18 | GSVIVT01011185001 | AMP deaminase putative / myoadenylate deaminase putative      | AT2G38280                      | yes      | yes | het     | yes         |
| chr18 | GSVIVT01025945001 | K-box region and MADS-box transcription factor family protein | AT4G09960                      | yes      | no  | het     | yes         |
| chr18 | GSVIVT01025948001 | AGAMOUS-like 11                                               | AT1G33990                      | yes      | yes | het     | yes         |
| chr15 | GSVIVT01027462001 | dicer-like 1                                                  | AT1G01040                      | yes      | yes | hom     | yes         |
| chr9  | GSVIVT01034226001 | Nucleic acid-binding OB-fold-like protein                     | AT1G49400                      | yes      | yes | hom     |             |
| chr9  | GSVIVT01034243001 | Nucleic acid-binding OB-fold-like protein                     | AT1G49400                      | yes      | no  | hom     |             |
| chr7  | GSVIVT01000712001 | Histone acetyltransferase of the GNAT family 1                | AT3G54610                      | yes      | yes | hom     |             |
| chr7  | GSVIVT01000713001 | Histone acetyltransferase of the GNAT family 1                | AT3G54610                      | yes      | yes | hom     |             |
| chr7  | GSVIVT01028407001 | Ribosomal protein L14p/L23e family protein                    | AT3G04400                      | yes      | yes | hom     |             |

continued in next page

| Chr   | Transcript ID     | Annotation                                                               | Ortholog<br><i>Arabidopsis</i> | Promoter | CDS | Hom/Het | QTL Related |
|-------|-------------------|--------------------------------------------------------------------------|--------------------------------|----------|-----|---------|-------------|
| chr7  | GSVIVT01028540001 | AP2/B3-like transcriptional factor family protein                        | AT3G24650                      | yes      | yes | hom     |             |
| chr6  | GSVIVT01024779001 | Elongation factor Ts family protein                                      | AT4G29060                      | yes      | yes | hom     |             |
| chr6  | GSVIVT01024961001 | Tim10/DDP family zinc finger protein                                     | AT3G46560                      | yes      | no  | hom     |             |
| chr6  | GSVIVT01024967001 | mRNA adenosine methylase                                                 | AT4G10760                      | yes      | yes | hom     |             |
| chr6  | GSVIVT01025401001 | Tetratricopeptide repeat (TPR)-like superfamily protein                  | AT4G39620                      | yes      | yes | hom     |             |
| chr4  | GSVIVT01018991001 | RNA-binding (RRM/RBD/RNP motifs) family protein                          | AT2G18510                      | yes      | no  | hom     |             |
| chr4  | GSVIVT01035995001 | Monogalactosyl diacylglycerol synthase 1                                 | AT4G31780                      | yes      | yes | hom     |             |
| chr3  | GSVIVT01024003001 | PAM domain (PCI/PINT associated module) protein                          | AT1G20200                      | yes      | yes | hom     |             |
| chr3  | GSVIVT01031733001 | Tetratricopeptide repeat (TPR)-like superfamily protein                  | AT4G33990                      | yes      | yes | hom     |             |
| chr18 | GSVIVT01009281001 | Embryo defective 1273                                                    | AT1G49510                      | yes      | yes | hom     |             |
| chr18 | GSVIVT01009339001 | P-loop containing nucleoside triphosphate hydrolases superfamily protein | AT5G22370                      | yes      | no  | hom     |             |

continued in next page

| Chr   | Transcript ID     | Annotation                                                                             | Ortholog<br><i>Arabidopsis</i> | Promoter | CDS | Hom/Het | QTL Related |
|-------|-------------------|----------------------------------------------------------------------------------------|--------------------------------|----------|-----|---------|-------------|
| chr18 | GSVIVT01009836001 | Transducin/WD40 repeat-like superfamily protein                                        | AT4G29860                      | yes      | no  | hom     |             |
| chr17 | GSVIVT01007911001 | RNA helicase family protein                                                            | AT1G32490                      | yes      | yes | hom     |             |
| chr16 | GSVIVT01018617001 | Glycosyl hydrolase 9B1                                                                 | AT1G70710                      | yes      | yes | hom     |             |
| chr16 | GSVIVT01018619001 | Glycosyl hydrolase 9B1                                                                 | AT1G70710                      | yes      | yes | hom     |             |
| chr16 | GSVIVT01024440001 | Transducin family protein / WD-40 repeat family protein                                | AT1G15750                      | yes      | no  | hom     |             |
| chr16 | GSVIVT01038617001 | Ubiquitin extension protein 1                                                          | AT3G52590                      | yes      | no  | hom     |             |
| chr14 | GSVIVT01021979001 | Dehydroquinase putative / shikimate dehydrogenase putative                             | AT3G06350                      | yes      | yes | hom     |             |
| chr13 | GSVIVT01016288001 | Chorismate synthase putative / 5-enolpyruvylshikimate-3-phosphate phosphatase putative | AT1G48850                      | yes      | no  | hom     |             |
| chr13 | GSVIVT01016290001 | Para-aminobenzoate (PABA) synthase family protein                                      | AT2G28880                      | yes      | yes | hom     |             |
| chr13 | GSVIVT01016291001 | Para-aminobenzoate (PABA) synthase family protein                                      | AT2G28880                      | yes      | yes | hom     |             |

continued in next page

| Chr   | Transcript ID     | Annotation                                                         | Ortholog<br><i>Arabidopsis</i> | Promoter | CDS | Hom/Het | QTL Related |
|-------|-------------------|--------------------------------------------------------------------|--------------------------------|----------|-----|---------|-------------|
| chr12 | GSVIVT01029694001 | COP9 signalosome subunit CSN8                                      | AT4G14110                      | yes      | yes | hom     |             |
| chr11 | GSVIVT01015184001 | CCCH-type zinc finger family protein                               | AT5G56930                      | yes      | yes | hom     |             |
| chr11 | GSVIVT01015254001 | Class II aminoacyl-tRNA and biotin synthetases superfamily protein | AT5G56680                      | yes      | no  | hom     |             |
| chr11 | GSVIVT01015286001 | Arginyl-tRNA synthetase class Ic                                   | AT4G26300                      | yes      | yes | hom     | yes         |
