# Supplementary material for: Whole genome comparison between table and wine grapes reveals a comprehensive catalog of structural variants
Source: PubMed Central journal article supplement (PMC3890619; doi:10.1186/1471-2229-14-7), 2014-01-07
Supplement: 1471-2229-14-7-S13.pdf [file 1471-2229-14-7-S13.pdf]

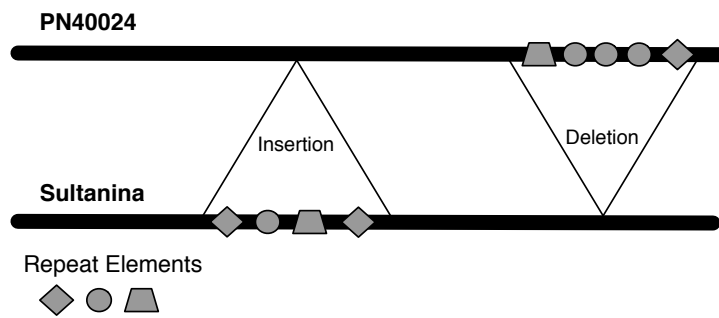

**Supplementary Figure 5:** Identification of transposable elements within INDELs. We masked the repeat elements in the reference and the ‘Sultanina’ genomes using RepBase. Then, for each INDEL of length over than 50 bp we counted the total size in bp of the repeated elements contained within it.
